# Supplementary material for: Four-component reaction between naphthols, substituted β-nitrostyrenes, substituted benzaldehydes and ammonium acetate in water–PEG-400: an approach to construct polysubstituted naphthofuranamines
Source: Royal Society of Chemistry journal article supplement (doi:10.1039/c5ra07642k), 2015-01-01
Supplement: c5ra07642k1.pdf [file c5ra07642k1.pdf]

*Supporting materials*

**Four-component reaction between naphthols, substituted  $\beta$ -nitrostyrenes, substituted benzaldehydes and ammonium acetate in water-PEG 400: approach to construct polysubstituted naphthofuranamines**

**Jungui Zhang, Juan Yao, Jiaming Liu, Shuwen Xue, Yang Li and Cunde Wang\***

School of Chemistry and Chemical Engineering, Yangzhou University,  
180 Siwangting Street, Yangzhou 225002, P. R. China

\* To whom correspondence should be addressed.  
School of Chemistry and Chemical Engineering,  
Yangzhou University,  
180 Siwangting Street, Yangzhou 225002,  
Jiangsu, P. R. China  
Tel: +86-514-8797-5568, Fax: +86-514-8797-5244  
E-mail: wangcd@yzu.edu.cn

**CONTENTS**

|                                                                                                  |     |
|--------------------------------------------------------------------------------------------------|-----|
| 1. Experimental Section, General.....                                                            | S2  |
| 2. General procedure for preparation of polysubstituted naphthofuranamines ( <b>4a-4x</b> )..... | S2  |
| 3. Spectroscopic data of the products <b>4a-4x</b> .....                                         | S3  |
| 4 Copies of NMR Spectroscopies.....                                                              | S11 |
| 5. X-ray Structure of <b>4b</b> and <b>4f</b> .....                                              | S35 |

## Experimental section

All melting points were determined in a Yanaco melting point apparatus and are uncorrected. IR spectra were recorded in a Nicolet FT-IR 5DX spectrometer. The  $^1\text{H}$  NMR (400 or 600 MHz) and  $^{13}\text{C}$  NMR (100 or 150 MHz) spectra were recorded in a Bruker AV-600 spectrometer with TMS as internal reference in  $\text{CDCl}_3$  solutions. The  $J$  values are given in hertz. Only discrete or characteristic signals for the  $^1\text{H}$  NMR are reported. The MS spectra were obtained on a ZAB-HS mass spectrometer with 70 eV. X-ray crystallographic analysis was performed with a SMART APEX-II diffractometer. Flash chromatography was performed on silica gel (230-400 mesh) eluting with ethyl acetate-hexanes mixture. All reactions were monitored by thin layer chromatography (TLC). All reagents and solvents were purchased from commercial sources and purified commonly before used.

### ***General procedure for preparation of polysubstituted naphthofuranamines via four-component reaction***

The standard procedure for the synthesis of polysubstituted naphthofuranamines via four-component reaction between substituted  $\beta$ -nitrostyrenes,  $\beta$ -naphthols or  $\alpha$ -naphthol, substituted benzaldehydes and ammonium acetate is as follows. To the mixture of substituted  $\beta$ -nitrostyrenes (3 mmol),  $\beta$ -naphthols or  $\alpha$ -naphthol (4.5 mmol) and sodium hydroxide (6 mmol, 0.24g) in water (13 mL) and PEG-400 (2 mL) was added corresponding imines generated firstly from substituted benzaldehydes (3 mmol) and ammonium acetate (6.0 mmol, 0.462g). The resulting mixture was stirred at 80 °C for 8 h for  $\beta$ -naphthols or 12 h for  $\alpha$ -naphthol, and the completion of reaction was confirmed by TLC (Hexanes/EtOAc, 5:1). Subsequently, the reaction mixture was extracted with dichloromethane (10 mL X 2). The organic phase was washed with 3% HCl (10 mL), water (10 mL) and brine (5 mL), and dried over anhydrate sodium sulfate. After removal of dichloromethane, the crude product was purified by flash chromatography (silica gel, EtOAc/hexanes, 1/8) to give the desirable products **4a-x**.

### Spectroscopic data of the products 4a-4x

#### (E)-N-(1-(4-methoxyphenyl)naphtho[2,1-b]furan-2-yl)-1-(p-tolyl)methanimine (**4a**)

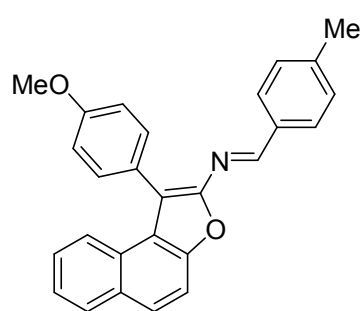

Yellow solid, yield 86%, m.p. 168.1 °C; <sup>1</sup>H NMR (400 MHz, CDCl<sub>3</sub>) δ (ppm): 8.90 (s, 1 H), 8.07 (d, *J* = 8.4 Hz, 1 H), 7.90 (d, *J* = 8.0 Hz, 1 H), 7.76 (d, *J* = 8.8 Hz, 1 H), 7.75 (d, *J* = 8.4 Hz, 2 H), 7.62 (d, *J* = 8.8 Hz, 3 H), 7.42 (dd, *J* = 7.2 Hz, 1 H), 7.35 (dd, *J* = 8.4 Hz, 1 H), 7.21 (d, *J* = 8.0 Hz, 2 H), 7.08 (d, *J* = 8.8 Hz, 2 H), 3.94 (s, 3 H), 2.39 (s, 3H); <sup>13</sup>C NMR (CDCl<sub>3</sub>, 100 MHz) δ (ppm): 159.1, 155.3, 152.8, 149.1, 141.7, 134.1, 132.2, 130.8, 129.4, 129.0, 128.8, 128.2, 126.6, 125.9, 125.2, 124.3, 123.7, 122.9, 113.6, 111.9, 55.3, 21.7; IR (KBr, cm<sup>-1</sup>): 2932, 1640, 1526, 1439, 1379, 1180, 1045, 832, 810; MS (EI) (m/z): 392.7 [(M+1)<sup>+</sup>].

#### (E)-1-(4-chlorophenyl)-N-(1-(3-methoxyphenyl)naphtho[2,1-b]furan-2-yl)methanimine (**4b**)

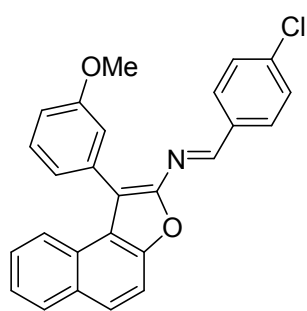

Yellow solid, yield, 83%, m.p. 162.5 °C; <sup>1</sup>H NMR (400 MHz, CDCl<sub>3</sub>) δ (ppm): 8.87 (d, *J* = 4.0 Hz, 1 H), 8.06 (d, *J* = 8.0 Hz, 1 H), 7.91 (d, *J* = 8.0 Hz, 1 H), 7.81-7.76 (m, 3 H), 7.62 (d, *J* = 9.2 Hz, 1 H), 7.49-7.43 (m, 2 H), 7.42-7.35 (m, 3H), 7.28 (d, *J* = 7.6 Hz, 1 H), 7.25-7.24 (m, 1 H), 7.06 (dd, *J*<sub>1</sub> = 1.2 Hz, *J*<sub>2</sub> = 8.4 Hz, 1 H), 3.87 (s, 1 H); <sup>13</sup>C NMR (CDCl<sub>3</sub>, 100 MHz) δ (ppm): 159.3, 154.0, 149.32, 137.10, 135.0, 134.1, 130.8, 129.9, 129.1, 129.0, 128.9, 128.1, 126.2, 124.6, 123.8, 123.5, 122.7, 118.3, 116.1, 113.9, 111.9, 55.3; IR (KBr, cm<sup>-1</sup>): 2930, 1603, 1592, 1488, 1460, 1388, 1243, 1037, 834, 797. MS (EI) (m/z): 412.6 [(M+1)<sup>+</sup>].

#### (E)-1-(3-bromophenyl)-N-(1-(4-bromophenyl)naphtho[2,1-b]furan-2-yl)methanimine (**4c**)

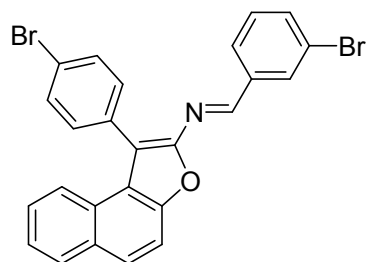

Yellow solid, yield 50%, m.p. 202.3 °C; <sup>1</sup>H NMR (400 MHz, CDCl<sub>3</sub>) δ (ppm): 8.84 (s, 1 H), 8.00-7.96 (m, 2 H), 7.92 (d, *J* = 8.4 Hz, 1 H), 7.80 (d, *J* = 8.4 Hz, 1 H), 7.74 (d, *J* = 7.2 Hz, 1 H), 7.68 (d, *J* = 8.0 Hz, 2 H), 7.62 (d, *J* = 8.8 Hz, 1 H), 7.58-7.54 (m, 3 H), 7.47-7.37 (m, 2 H), 7.30 (dd, *J* = 8.0 Hz, 1H); <sup>13</sup>C NMR (CDCl<sub>3</sub>, 100 MHz) δ (ppm): 154.0, 152.2, 149.5, 138.4, 134.0, 132.6, 131.8, 131.4, 130.9, 130.2, 129.2, 128.0, 127.6, 127.4, 126.4, 124.7, 123.4, 123.0, 122.3, 122.1, 111.9; IR (KBr, cm<sup>-1</sup>): 2921, 1642, 1578, 1482, 1379, 1251, 1072, 1035, 853, 802; MS (EI) (m/z): 506.6 [(M+3)<sup>+</sup>].

#### (E)-N-(1-(4-bromophenyl)naphtho[2,1-b]furan-2-yl)-1-(p-tolyl)methanimine (**4d**)

Yellow solid, yield 77%, m.p. 196.8 °C; <sup>1</sup>H NMR (400 MHz, CDCl<sub>3</sub>) δ (ppm):

8.90 (s, 1 H), 8.01 (d,  $J = 8.4$  Hz, 1 H), 7.91 (d,  $J = 8.0$  Hz, 1 H), 7.77 (d,  $J = 8.8$  Hz, 1 H), 7.73 (d,  $J = 8.0$  Hz, 2H), 7.69-7.67 (m, 2 H), 7.64-7.58 (m, 3 H), 7.44 (dd,  $J = 7.6$ Hz, 1 H), 7.38 (d,  $J = 6.8$  Hz, 1 H), 7.22 (d,  $J = 8.0$  Hz, 2 H), 2.40 (s, 3 H);  $^{13}\text{C}$  NMR ( $\text{CDCl}_3$ , 100 MHz)  $\delta$  (ppm): 156.0, 149.2, 142.1, 133.9, 132.7, 132.1, 131.3, 130.9, 129.5, 129.2, 128.9, 127.9, 126.9, 126.1, 124.5, 123.5, 122.4, 121.7, 111.9, 21.7; IR (KBr,  $\text{cm}^{-1}$ ): 3049, 1589, 1563, 1486, 1390, 1272, 1193, 1069, 803, 747; MS (EI) ( $m/z$ ): 442.6  $[(\text{M}+3)^+]$ .

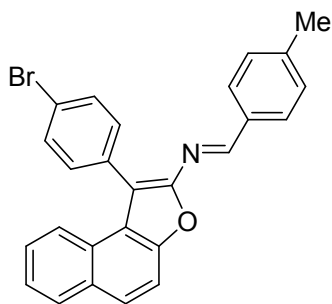

(E)-N-(7-bromo-1-(p-tolyl)naphtho[2,1-b]furan-2-yl)-1-(2-chlorophenyl)methanimine (4e)

Yellow solid, yield 76%, m.p. 219.9 °C;  $^1\text{H}$  NMR (400 MHz,  $\text{CDCl}_3$ )  $\delta$  (ppm): 9.31 (s, 1 H), 8.10 (d,  $J = 7.6$  Hz, 1 H), 8.06-8.05 (m, 1H), 7.93 (d,  $J = 8.8$  Hz, 1 H), 7.69 (s, 2H), 7.54 (d,  $J = 7.6$  Hz, 2 H), 7.44-7.39 (m, 2H), 7.35 (d,  $J = 7.6$  Hz, 2 H), 7.31 (d,  $J = 7.6$  Hz, 1 H), 7.27 (d,  $J = 7.6$  Hz, 1 H), 2.50 (s, 3H);  $^{13}\text{C}$  NMR ( $\text{CDCl}_3$ , 100 MHz)  $\delta$  (ppm): 152.8, 151.9, 149.4, 137.6, 136.2, 133.5, 132.1, 131.9, 131.0, 130.7, 129.9, 129.4, 129.2, 129.0, 128.4, 126.9, 126.6, 126.2, 125.3, 122.9, 118.7, 118.2, 113.1, 21.5; IR (KBr,  $\text{cm}^{-1}$ ): 2921, 1630, 1492, 1395, 1200, 1119, 962, 873, 755; MS (EI) ( $m/z$ ): 476.6  $[(\text{M}+3)^+]$ .

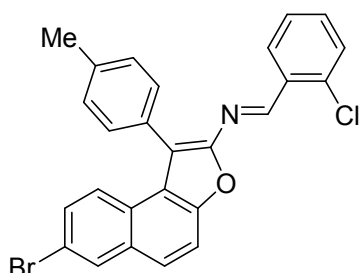

(E)-N-(1-(4-bromophenyl)naphtho[2,1-b]furan-2-yl)-1-(4-methoxyphenyl)methanimine (4f)

Yellow solid, yield 80%, m.p. 178.8 °C;  $^1\text{H}$  NMR (400 MHz,  $\text{CDCl}_3$ )  $\delta$  (ppm): 8.96 (s, 1 H), 8.01 (d,  $J = 8.0$  Hz, 1 H), 7.92 (d,  $J = 8.0$  Hz, 1 H), 7.80 (dd,  $J = 10.8$  Hz, 3 H), 7.67 (dd,  $J = 8.8$  Hz, 3 H), 7.61 (dd,  $J = 7.6$  Hz, 3 H), 7.44 (dd,  $J = 7.6$  Hz, 1 H), 7.39 (dd,  $J = 7.2$  Hz, 1 H), 6.95 (d,  $J = 8.4$  Hz, 2 H), 3.87 (s, 3 H);  $^{13}\text{C}$  NMR ( $\text{CDCl}_3$ , 100 MHz)  $\delta$  (ppm): 162.4, 155.5, 149.1, 132.7, 132.2, 131.2, 130.8, 130.7, 129.5, 129.1, 127.9, 126.6, 126.1, 124.5, 123.5, 122.4, 121.6, 114.3, 111.9, 55.4; IR (KBr,  $\text{cm}^{-1}$ ): 2953, 1630, 1556, 1407, 1379, 1291, 1162, 1042, 824, 775; MS (EI) ( $m/z$ ): 458.6  $[(\text{M}+3)^+]$ .

(E)-N-(7-bromo-1-(p-tolyl)naphtho[2,1-b]furan-2-yl)-1-(p-tolyl)methanimine (4g)

Yellow solid, yield 55%, m.p. 170.1 °C;  $^1\text{H}$  NMR (400 MHz,  $\text{CDCl}_3$ )  $\delta$  (ppm): 8.88 (s, 1 H), 8.05 (s, 1 H), 7.95 (d,  $J = 9.2$  Hz, 1 H), 7.73 (d,  $J = 8.0$  Hz, 2 H), 7.64 (s, 2H), 7.56 (d,  $J = 8.0$  Hz, 2 H), 7.40 (dd,  $J_1 = 8.8$  Hz,  $J_2 = 1.$

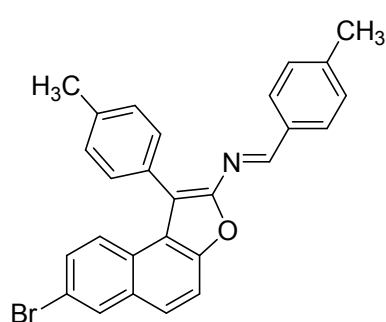

6 Hz, 1H), 7.35 (d,  $J = 8.0$  Hz, 2 H), 7.21 (d,  $J = 7.6$  Hz, 2 H), 2.52 (s, 3 H), 2.39 (s, 3 H);  $^{13}\text{C}$  NMR ( $\text{CDCl}_3$ , 100 MHz)  $\delta$  (ppm): 156.0, 153.1, 149.1, 141.9, 137.5, 133.9, 132.1, 130.9, 130.8, 130.8, 129.6, 129.5, 129.0, 128.9, 126.6, 125.5, 125.4, 123.0, 118.1, 116.9, 113.0, 21.8, 21.5; IR (KBr,  $\text{cm}^{-1}$ ): 2931, 1643, 1500, 1400, 1198, 1119, 867, 745; MS (EI) ( $m/z$ ): 454.0 [(M+1) $^+$ ].

(E)-N-(1-(4-chlorophenyl)naphtho[2,1-b]furan-2-yl)-1-(2-methoxyphenyl)methanimine (4h)

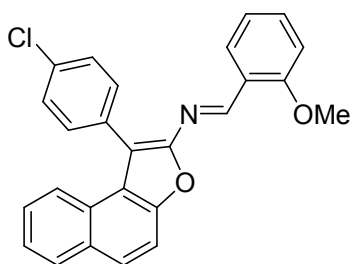

Yellow solid, yield 78%, m.p. 203.3 °C;  $^1\text{H}$  NMR (400 MHz,  $\text{CDCl}_3$ )  $\delta$  (ppm): 9.37 (s, 1 H), 8.02 (t,  $J = 7.2$  Hz, 2 H), 7.91 (d,  $J = 7.6$  Hz, 1 H), 7.77 (d,  $J = 8.0$  Hz, 1 H), 7.66 (s, 1 H), 7.64 (s, 1 H), 7.52 (s, 1 H), 7.50 (s, 1 H), 7.43 (dd,  $J = 6.8$  Hz, 1 H), 7.39-7.35 (m, 2 H), 6.98 (dd,  $J = 7.6$  Hz, 1 H), 6.92 (d,  $J = 8.4$  Hz, 1 H), 3.95 (s, 3 H);  $^{13}\text{C}$  NMR ( $\text{CDCl}_3$ , 100 MHz)  $\delta$  (ppm): 159.7, 153.6, 151.9, 149.2, 133.4, 132.8, 132.4, 131.7, 130.8, 129.1, 128.3, 127.9, 127.4, 126.8, 126.1, 125.0, 124.5, 123.5, 122.5, 120.9, 116.0, 112.0, 111.1, 55.6; IR (KBr,  $\text{cm}^{-1}$ ): 2923, 1603, 1521, 1416, 1390, 1247, 1160, 1037, 813, 773; MS (EI) ( $m/z$ ): 412.7 [(M+1) $^+$ ].

(E)-N-(1-(4-chlorophenyl)naphtho[2,1-b]furan-2-yl)-1-(4-methylphenyl)methanimine (4i)

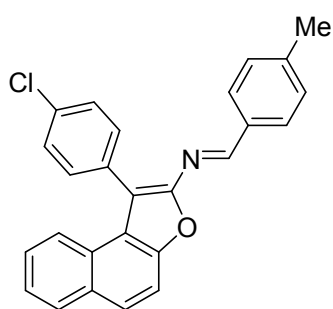

Yellow solid, yield 82%, m.p. 175.7 °C;  $^1\text{H}$  NMR (400 MHz,  $\text{CDCl}_3$ )  $\delta$  (ppm): 8.91 (s, 1 H), 8.00 (d,  $J = 8.0$  Hz, 1 H), 7.91 (d,  $J = 8.0$  Hz, 1 H), 7.77 (d,  $J = 8.8$  Hz, 1 H), 7.73 (d,  $J = 8.0$  Hz, 2 H), 7.66-7.63 (m, 3 H), 7.53 (s, 1 H), 7.51 (s, 1 H), 7.44 (dd,  $J = 7.2$  Hz, 1 H), 7.41-7.36 (m, 1 H), 7.25-7.22 (m, 2 H), 2.40 (s, 3 H);  $^{13}\text{C}$  NMR ( $\text{CDCl}_3$ , 100 MHz)  $\delta$  (ppm): 156.1, 152.9, 149.2, 142.0, 133.9, 133.5, 132.4, 131.6, 130.9, 129.5, 129.2, 128.9, 128.3, 127.9, 126.9, 126.1, 124.5, 123.5, 111.9, 21.7; IR (KBr,  $\text{cm}^{-1}$ ): 2931, 1621, 1489, 1390, 1149, 1100, 912, 749; MS (EI) ( $m/z$ ): 396.6 [(M+1) $^+$ ].

(E)-1-(4-methoxyphenyl)-N-(1-(4-nitrophenyl)naphtho[2,1-b]furan-2-yl)methanimine (4j)

Yellow solid, yield 56%, m.p. 201.6 °C;  $^1\text{H}$  NMR (400 MHz,  $\text{CDCl}_3$ )  $\delta$  (ppm): 8.93 (s, 1 H), 8.42-8.41 (m, 1 H), 8.40-8.38 (m, 1 H), 7.96 (s, 1 H), 7.94 (s, 1 H), 7.93-7.92 (m, 1 H), 7.91-7.90 (m, 1 H), 7.83-7.79 (m, 3 H), 7.65 (d,  $J = 8.8$  Hz, 1 H), 7.48-7.44 (m, 1 H), 7.42-7.38 (m, 1 H), 6.98 (s, 1 H), 6.95

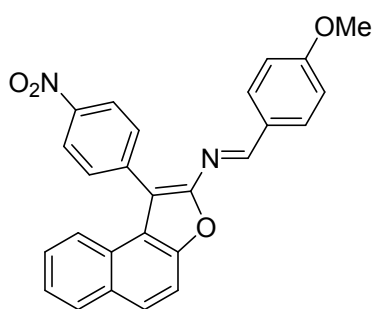

(s, 1 H), 3.87 (s, 3 H);  $^{13}\text{C}$  NMR ( $\text{CDCl}_3$ , 100 MHz)  $\delta$  (ppm): 162.8, 156.6, 153.6, 149.3, 147.1, 140.6, 131.9, 130.9, 130.9, 129.4, 129.2, 127.6, 127.1, 126.3, 124.7, 123.3, 121.9, 114.4, 111.9, 55.5; IR (KBr,  $\text{cm}^{-1}$ ): 2949, 1597, 1523, 1448, 1370, 1126, 1091, 823, 737; MS (EI) (m/z): 423.6 [(M+1) $^+$ ].

(E)-1-(2-chlorophenyl)-N-(1-(4-methoxyphenyl)naphtho[2,1-b]furan-2-yl)methanimine (**4k**)

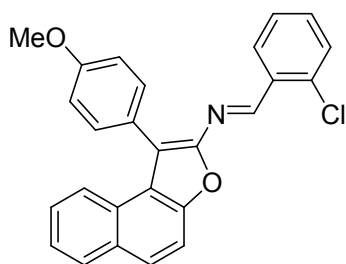

Yellow solid, yield 75%, m.p. 178.3 °C;  $^1\text{H}$  NMR (400 MHz,  $\text{CDCl}_3$ )  $\delta$  (ppm): 9.31 (s, 1 H), 8.13 (dd,  $J_1 = 7.6$  Hz,  $J_2 = 14$  Hz, 2 H), 7.91 (d,  $J = 8.0$  Hz, 1 H), 7.79 (d,  $J = 8.8$  Hz, 1 H), 7.65 (d,  $J = 8.8$  Hz, 1 H), 7.61 (d,  $J = 8.4$  Hz, 2 H), 7.45-7.36 (m, 3 H), 7.35-7.32 (m, 1 H), 7.30-7.27 (m, 1 H), 7.08 (d,  $J = 8.4$  Hz, 2 H), 3.94 (s, 3 H);  $^{13}\text{C}$  NMR ( $\text{CDCl}_3$ , 100 MHz)  $\delta$  (ppm): 159.3, 152.6, 151.3, 149.5, 136.0, 133.7, 132.1, 131.7, 130.8, 129.9, 129.1, 128.4, 128.3, 127.4, 126.9, 126.1, 125.0, 124.5, 123.6, 122.8, 118.9, 113.6, 112.1, 55.3; IR (KBr,  $\text{cm}^{-1}$ ): 2963, 1630, 1511, 1406, 1392, 1252, 1163, 1029, 823, 780; MS (EI) (m/z): 412.6 [(M+1) $^+$ ].

(E)-N-(7-bromo-1-(4-chlorophenyl)naphtho[2,1-b]furan-2-yl)-1-(3-phenoxyphenyl)methanimine (**4l**)

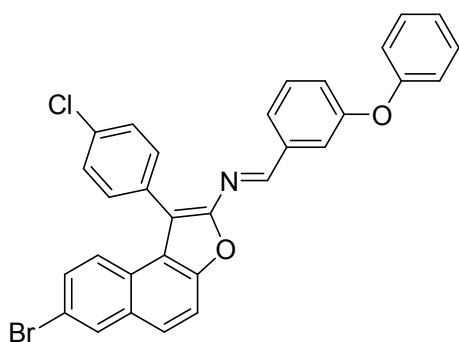

Yellow solid, yield 83%, m.p. 163.3 °C;  $^1\text{H}$  NMR (400 MHz,  $\text{CDCl}_3$ )  $\delta$  (ppm): 8.82 (s, 1 H), 8.05 (d,  $J = 1.6$  Hz, 1 H), 7.86 (d,  $J = 8.8$  Hz, 1 H), 7.65 (d,  $J = 8.8$  Hz, 2H), 7.55-7.50 (m, 3 H), 7.46-7.42 (m, 4 H), 7.38 (dd,  $J = 8.0$  Hz, 3 H), 7.20 (dd,  $J = 7.2$  Hz, 1 H), 7.11 (dd,  $J_1 = 8.0$  Hz,  $J_2 = 2.0$  Hz, 1 H), 7.03 (d,  $J = 7.6$  Hz, 2 H);  $^{13}\text{C}$  NMR ( $\text{CDCl}_3$ , 100 MHz)  $\delta$  (ppm): 158.1, 156.3, 155.5, 152.7, 149.3, 138.1, 133.8, 132.1, 132.1, 131.1, 130.9, 130.1, 129.9, 129.4, 128.5, 126.4, 126.2, 125.1, 124.0, 123.9, 122.4, 121.7, 119.6, 118.4, 117.3, 116.9, 113.0; IR (KBr,  $\text{cm}^{-1}$ ): 3060, 2912, 1580, 1489, 1438, 1349, 1246, 1211, 1089, 857, 785; MS (EI) (m/z): 554.3 [(M+2) $^+$ ].

(E)-1-(4-methoxyphenyl)-N-(1-(4-methoxyphenyl)naphtho[2,1-b]furan-2-yl)methanimine (**4m**)

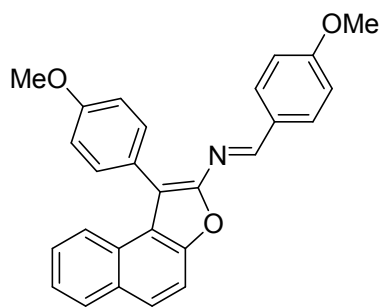

Yellow solid, yield 88%, m.p. 197.3 °C; <sup>1</sup>H NMR (400 MHz, CDCl<sub>3</sub>) δ (ppm): 8.87 (s, 1 H), 8.07 (d, *J* = 8.4 Hz, 1 H), 7.90 (d, *J* = 7.6 Hz, 1 H), 7.79 (d, *J* = 8.8 Hz, 2 H), 7.74 (d, *J* = 8.8 Hz, 1 H), 7.61 (d, *J* = 8.4 Hz, 3 H), 7.41 (dd, *J*<sub>1</sub> = 1.2 Hz, *J*<sub>2</sub> = 7.2 Hz, 1 H), 7.34 (dd, *J*<sub>1</sub> = 1.2 Hz, *J*<sub>2</sub> = 8.0 Hz, 1 H), 7.07 (d, *J* = 8.4 Hz, 2H), 6.92 (d, *J* = 8.8 Hz, 2H), 3.94 (s, 3H), 3.85 (s, 3H); <sup>13</sup>C NMR (CDCl<sub>3</sub>, 100 MHz) δ (ppm): 162.2, 159.1, 154.8, 152.9, 148.9, 132.2, 130.8, 130.6, 129.7, 129.0, 128.2, 126.4, 125.9, 125.3, 124.3, 123.7, 122.9, 116.3, 114.2, 113.6, 111.9, 55.4, 55.3; IR (KBr, cm<sup>-1</sup>): 2943, 1610, 1572, 1480, 1253, 1176, 1035, 825, 813; MS(EI) (m/z): 408.7 [(M+1)<sup>+</sup>].

(E)-N-(1-(4-methoxyphenyl)naphtho[2,1-b]furan-2-yl)-1-(thiophen-3-yl)methanimine (4n)

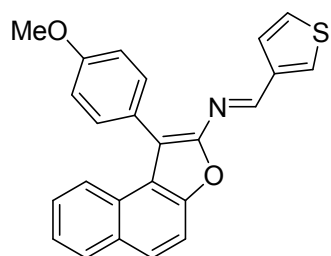

Yellow solid, yield 76%, m.p. 150.1 °C; <sup>1</sup>H NMR (400 MHz, CDCl<sub>3</sub>) δ (ppm): 8.92 (s, 1 H), 8.06 (d, *J* = 8.0 Hz, 1 H), 7.89 (d, *J* = 8.0 Hz, 1 H), 7.77-7.75 (m, 2 H), 7.62-7.58 (m, 4 H), 7.42 (dd, *J* = 8.0 Hz, 1 H), 7.35 (dd, *J* = 7.2 Hz, 1 H), 7.31-7.29 (m, 1 H), 7.06 (d, *J* = 8.4 Hz, 2 H), 3.93 (s, 3 H); <sup>13</sup>C NMR (CDCl<sub>3</sub>, 100 MHz) δ (ppm): 159.2, 152.6, 149.5, 149.1, 141.4, 132.1, 130.8, 129.9, 129.0, 128.2, 126.7, 126.4, 126.1, 125.9, 125.1, 124.4, 123.6, 122.9, 117.1, 113.6, 111.9, 55.3; IR (KBr, cm<sup>-1</sup>): 2924, 1624, 1389, 1231, 1159, 1072, 859, 827; MS (EI) (m/z): 384.5[(M+1)<sup>+</sup>] (100%).

(E)-N-(1-(4-bromophenyl)naphtho[2,1-b]furan-2-yl)-1-(4-fluoro-3-phenoxyphenyl)methanimine (4o)

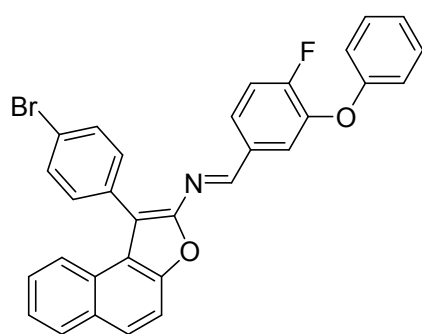

Yellow solid, yield 87%, m.p. 173.5 °C <sup>1</sup>H NMR (400 MHz, CDCl<sub>3</sub>) δ (ppm): 8.78 (s, 1 H), 7.99 (d, *J* = 8.4 Hz, 1 H), 7.90 (d, *J* = 8.0 Hz, 1 H), 7.78 (d, *J* = 8.8 Hz, 1 H), 7.60 (d, *J* = 3.6 Hz, 1 H), 7.58 (d, *J* = 3.2 Hz, 2H), 7.54-7.49 (m, 4H), 7.44 (dd, *J* = 7.6 Hz, 1 H), 7.38 (dd, *J* = 7.6 Hz, 3 H), 7.22 (s, 1 H), 7.20 (s, 1 H), 7.03 (d, *J* = 8.0 Hz, 2 H); <sup>13</sup>C NMR (CDCl<sub>3</sub>, 100 MHz) δ (ppm): 156.2, 154.5, 153.6, 153.6, 152.5 (d, *J* = 243.5 Hz), 151.1, 150.5, 149.9, 147.4, 145.2, 145.1, 133.6, 133.6, 133.7, 132.5, 131.3, 130.8, 129.9, 129.2, 127.9, 127.4, 126.3, 125.3, 125.2, 124.9 (d, *J* = 7.5 Hz), 123.5, 122.2, 121.8, 119.7 (d, *J* = 6.9 Hz), 118.4, 117.4, 117.2 (*J* = 18.9 Hz), 111.9, 77.2; IR (KBr, cm<sup>-1</sup>): 3049, 2923, 1584, 1508, 1488, 1366, 1279, 1214, 1068, 801, 741; MS (EI) (m/z): 540.0 [(M+1)<sup>+</sup>].

(E)-N-(1-(4-chlorophenyl)naphtho[2,1-b]furan-2-yl)-1-(3-phenoxyphenyl)methanimine (**4p**)

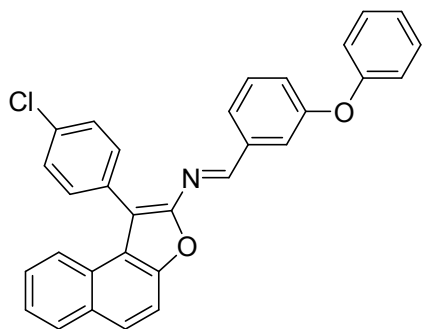

Yellow solid, yield 86%, m.p. 155.0 °C; <sup>1</sup>H NMR (400 MHz, CDCl<sub>3</sub>) δ (ppm): 8.85 (d, *J* = 7.2 Hz, 1 H), 8.00 (dd, *J* = 8.8 Hz, 1 H), 7.91 (d, *J* = 8.0 Hz, 1 H), 7.81-7.75 (m, 2 H), 7.69-7.58 (m, 3 H), 7.52 (d, *J* = 7.6 Hz, 2 H), 7.49-7.42 (m, 3 H), 7.38 (dd, *J* = 8.4 Hz, 4 H), 7.19 (dd, *J* = 7.2 Hz, 1 H), 7.08 (d, *J* = 8.0 Hz, 1 H), 7.03 (d, *J* = 8.0 Hz, 1 H); <sup>13</sup>C NMR (CDCl<sub>3</sub>, 100 MHz) δ (ppm): 158.1, 156.4, 154.9, 154.3, 152.4, 149.4, 149.4, 138.3, 137.3, 134.9, 133.7, 133.6, 132.3, 132.3, 131.4, 131.3, 131.1, 130.8, 130.8, 130.1, 129.9, 129.9, 129.2, 129.0, 128.8, 128.4, 128.3, 128.0, 127.4, 127.3, 126.3, 126.2, 124.7, 124.6, 123.9, 123.9, 123.5, 123.4, 122.4, 122.3, 121.5, 119.5, 119.1, 117.3, 111.9; IR (KBr, cm<sup>-1</sup>): 3055, 2922, 1587, 1486, 1444, 1365, 1245, 1210, 1086, 1005, 802, 742; MS (EI) (*m/z*): 474.6 [(M+1)<sup>+</sup>].

(E)-N-(1-(4-chlorophenyl)naphtho[2,1-b]furan-2-yl)-1-(3-methoxyphenyl)methanimine (**4q**)

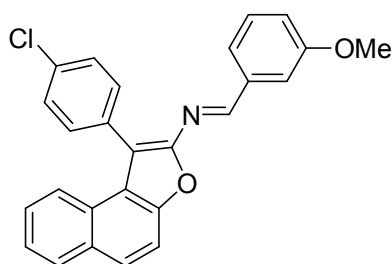

Yellow solid, yield 58%, m.p. 185.4 °C; <sup>1</sup>H NMR (400 MHz, CDCl<sub>3</sub>) δ (ppm): 8.88 (s, 1 H), 8.01 (d, *J* = 8.0 Hz, 1 H), 7.91 (d, *J* = 8.0 Hz, 1 H), 7.78 (d, *J* = 9.2 Hz, 1 H), 7.64 (dd, *J* = 8.8 Hz, 3 H), 7.51 (d, *J* = 8.4 Hz, 2H), 7.46-7.38 (m, 4 H), 7.34 (dd, *J* = 8.0 Hz, 1 H), 6.98 (d, *J* = 7.6 Hz, 1 H), 3.84 (s, 3 H); <sup>13</sup>C NMR (CDCl<sub>3</sub>, 100 MHz) δ (ppm): 159.9, 155.8, 152.6, 149.3, 137.9, 133.6, 132.4, 131.5, 130.9, 129.7, 129.2, 128.3, 127.9, 127.2, 126.2, 124.6, 123.5, 122.2, 117.7, 112.6, 111.9, 55.3; IR (KBr, cm<sup>-1</sup>): 2933, 1615, 1601, 1492, 1393, 1250, 1035, 840, 783; MS (EI) (*m/z*): 412.6 [(M+1)<sup>+</sup>].

(E)-N-(7-bromo-1-(4-chlorophenyl)naphtho[2,1-b]furan-2-yl)-1-(3-bromophenyl)methanimine (**4r**)

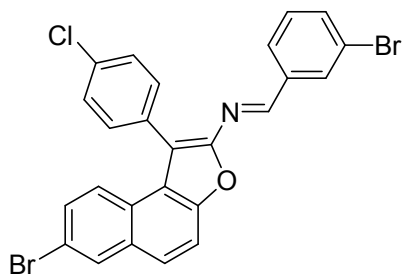

Yellow solid, yield 54%, m.p. 210.1 °C; <sup>1</sup>H NMR (400 MHz, CDCl<sub>3</sub>) δ (ppm): 8.82 (s, 1 H), 8.07 (s, 1 H), 7.98 (s, 1 H), 7.87-7.84 (m, 2 H), 7.75-7.70 (m, 2 H), 7.64 (d, *J* = 9.2 Hz, 2 H), 7.59 (d, *J* = 7.6 Hz, 1 H), 7.55 (d, *J* = 7.6 Hz, 1 H), 7.50-7.45 (m, 2 H), 7.31 (dd, *J* = 7.6 Hz, 1 H); <sup>13</sup>C NMR (CDCl<sub>3</sub>, 100 MHz) δ (ppm): 154.7, 149.8, 138.2, 134.5, 134.3, 133.8, 132.2, 131.5, 131.2, 131.1, 130.3, 129.8, 129.6, 129.4, 127.6, 126.5, 126.3, 125.1, 123.1, 122.3, 118.5, 113.2; IR (KBr, cm<sup>-1</sup>): 2930, 1647, 1546, 1489, 1400, 1256, 1246, 857, 820; MS (EI) (*m/z*): 538.



9 [(M+2)<sup>+</sup>].

(E)-N-(7-bromo-1-(3-methoxyphenyl)naphtho[2,1-b]furan-2-yl)-1-(p-tolyl)methanimine (**4s**)

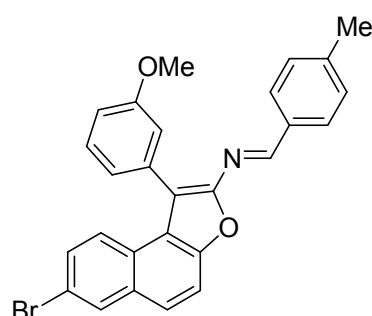

Yellow solid, yield 65%, m.p. 176.1 °C; <sup>1</sup>H NMR (400 MHz, CDCl<sub>3</sub>) δ (ppm): 8.89 (s, 1 H), 8.03 (d, *J* = 1.6 Hz, 1 H), 7.71 (d, *J* = 8.0 Hz, 2 H), 7.65 (s, 2 H), 7.58 (d, *J* = 9.2 Hz, 1 H), 7.54-7.49 (m, 2 H), 7.38-7.36 (m, 1 H), 7.19 (d, *J* = 8.0 Hz, 2 H), 7.15 (d, *J* = 7.2 Hz, 1 H), 7.07 (d, *J* = 8.0 Hz, 1 H), 3.67 (s, 3 H), 2.34 (s, 3 H); <sup>13</sup>C NMR (CDCl<sub>3</sub>, 100 MHz) δ (ppm): 157.8, 156.1, 153.3, 148.9, 141.9, 133.9, 133.3, 131.9, 130.5, 129.6, 129.4, 129.0, 128.8, 127.1, 125.5, 125.2, 123.9, 121.8, 120.5, 117.9, 113.4, 113.1, 110.8, 55.2, 22.2; IR (KBr, cm<sup>-1</sup>): 2945, 1640, 1532, 1458, 1398, 1254, 1267, 857, 827; MS (EI) (m/z): 471.1[(M+1)<sup>+</sup>]

(E)-N-(3-(4-bromophenyl)naphtho[1,2-b]furan-2-yl)-1-(2-methoxyphenyl)methanimine (**4t**)

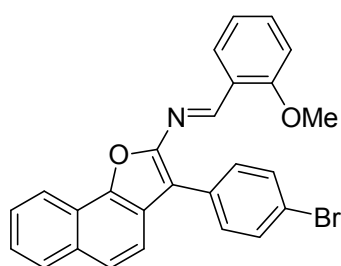

Yellow solid, yield 38%, m.p. 230.0 °C; <sup>1</sup>H NMR (400 MHz, CDCl<sub>3</sub>) δ (ppm): 9.50 (s, 1 H), 8.40 (d, *J* = 8.0 Hz, 1 H), 8.91 (dd, *J*<sub>1</sub> = 1.2 Hz, *J*<sub>2</sub> = 7.6 Hz, 1 H), 7.92 (d, *J* = 8.0 Hz, 1 H), 7.83 (dd, *J* = 8.4 Hz, 3 H), 7.71-7.65 (m, 3 H), 7.61 (dd, *J* = 7.6 Hz, 1 H), 7.51 (dd, *J* = 8.4 Hz, 1 H), 7.45 (d, *J*<sub>1</sub> = 1.6 Hz, *J*<sub>2</sub> = 8.8 Hz, 1 H), 7.04 (dd, *J* = 7.6 Hz, 1 H), 6.97 (d, *J* = 8.0 Hz, 1 H); <sup>13</sup>C NMR (CDCl<sub>3</sub>, 100 MHz) δ (ppm): 159.8, 152.0, 147.2, 132.9, 132.1, 131.6, 131.5, 131.2, 130.9, 128.5, 127.5, 126.5, 125.5, 125.1, 123.7, 123.7, 121.2, 121.1, 120.9, 120.4, 118.5, 111.5, 102.7, 55.7; IR (KBr, cm<sup>-1</sup>): 2931, 1642, 1562, 1433, 1380, 1299, 1179, 1062, 857, 773; MS (EI) (m/z): 458.7 [(M+2)<sup>+</sup>].

(E)-N-(3-(4-bromophenyl)naphtho[1,2-b]furan-2-yl)-1-(p-tolyl)methanimine (**4u**)

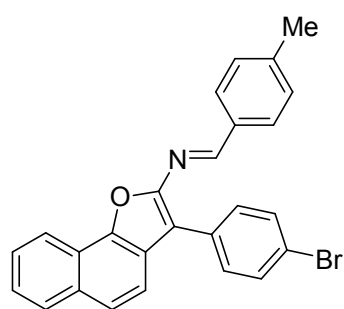

Yellow solid, yield 45%, m.p. 202.9 °C; <sup>1</sup>H NMR (400 MHz, CDCl<sub>3</sub>) δ (ppm): 9.06 (s, 1 H), 8.36 (d, *J* = 7.6 Hz, 1 H), 7.92 (d, *J* = 8.4 Hz, 1 H), 7.86 (s, 1 H), 7.84-7.79 (m, 5 H), 7.71 (s, 1 H), 7.68 (dd, *J* = 2.8 Hz, 1 H), 7.65 (dd, *J* = 2.8 Hz, 1 H), 7.63-7.59 (m, 1 H), 7.55-7.47 (m, 1 H), 7.28 (d, *J* = 8.0 Hz, 2 H), 2.43 (s, 3 H); <sup>13</sup>C NMR (CDCl<sub>3</sub>, 100 MHz) δ (ppm): 156.2, 152.1, 147.1, 142.2, 134.0, 132.1, 131.6, 131.4, 131.2, 129.6, 129.0, 128.5, 126.5, 125.6, 123.8, 123.7, 121.3, 121.0, 120.2, 118.5, 114.6, 21.7; IR (KBr, cm<sup>-1</sup>): 2928, 1590, 1490, 1394, 1275, 1200, 1171, 820, 779; MS (EI) (m/z): 440.6 [(M+1)<sup>+</sup>].

(E)-1-(4-methoxyphenyl)-N-(3-(p-tolyl)naphtho[1,2-b]furan-2-yl)methanimine (**4v**)

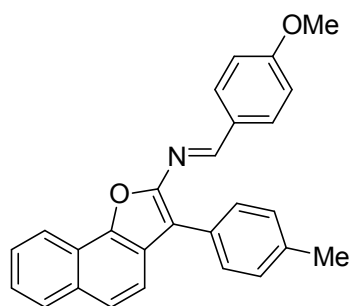

Yellow solid, yield 55%, m.p. 152.1 °C; <sup>1</sup>H NMR (400 MHz, CDCl<sub>3</sub>) δ(ppm): 9.03 (s, 1 H), 8.36 (d, *J* = 8.4 Hz, 1 H), 7.91 (d, *J* = 8.8 Hz, 3 H), 7.86 (d, *J* = 8.4 Hz, 3 H), 7.69 (d, *J* = 8.4 Hz, 1 H), 7.60 (dd, *J* = 7.2 Hz, 1 H), 7.49 (dd, *J* = 7.2 Hz, 1 H), 6.98 (d, *J* = 8.8 Hz, 2 H), 3.88 (s, 3 H), 2.45 (s, 3 H); <sup>13</sup>C NMR (CDCl<sub>3</sub>, 100 MHz) δ (ppm): 162.3, 154.8, 152.1, 146.9, 136.9, 132.0, 130.7, 129.8, 129.5, 129.2, 128.4, 126.3, 125.3, 124.3, 123.4, 121.1, 120.2, 119.0, 115.0, 114.3, 110.0, 55.4, 21.3; IR (KBr, cm<sup>-1</sup>): 2936, 1652, 1539, 1460, 1389, 1200, 1100, 846, 829; MS (EI) (m/z): 392.7 [(M+1)<sup>+</sup>].

(E)-1-(4-bromophenyl)-N-(3-(4-methoxyphenyl)naphtho[1,2-b]furan-2-yl)methanimine (**4w**)

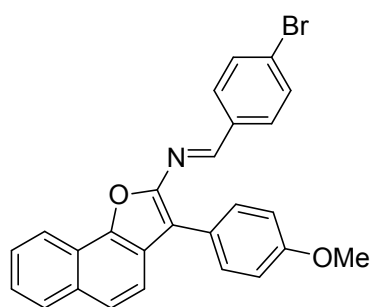

Yellow solid, yield 50%, m.p. 218.3 °C; <sup>1</sup>H NMR (400 MHz, CDCl<sub>3</sub>) δ (ppm): 8.99 (s, 1 H), 8.35 (d, *J* = 8.0 Hz, 1 H), 7.92 (d, *J* = 8.0 Hz, 1 H), 7.87 (d, *J* = 8.4 Hz, 1 H), 7.86 (d, *J* = 8.4 Hz, 2 H), 7.80 (d, *J* = 8.4 Hz, 2 H), 7.68 (d, *J* = 8.8 Hz, 1 H), 7.63-7.59 (m, 3H), 7.51 (dd, *J* = 8.0 Hz, 1 H), 7.09 (d, *J* = 8.8 Hz, 2 H), 3.91 (s, 3 H); <sup>13</sup>C NMR (DMSO-*d*<sub>6</sub>, 100 MHz) δ (ppm): 159.3, 155.3, 151.2, 146.9, 135.9, 132.6, 132.3, 131.0, 130.9, 129.1, 127.4, 126.5, 125.6, 124.5, 124.0, 123.9, 120.7, 120.4, 119.2, 116.2, 114.7, 55.7; IR (KBr, cm<sup>-1</sup>): 2921, 1645, 1550, 1416, 1382, 1290, 1178, 1100, 827, 778; MS (EI) (m/z): 458.6 [(M+2)<sup>+</sup>].

(E)-1-(4-bromophenyl)-N-(3-(4-chlorophenyl)naphtho[1,2-b]furan-2-yl)methanimine (**4x**)

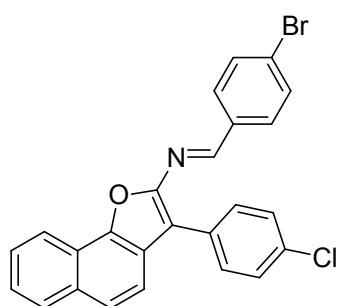

Yellow solid, yield 44%, m.p. 209.3 °C; <sup>1</sup>H NMR (400 MHz, CDCl<sub>3</sub>) δ (ppm): 9.04 (s, 1 H), 8.36 (d, *J* = 8.0 Hz, 1 H), 7.94 (d, *J* = 8.4 Hz, 1 H), 7.88 (d, *J* = 8.4 Hz, 2 H), 7.81 (d, *J* = 8.0 Hz, 2 H), 7.71 (d, *J* = 8.4 Hz, 1 H), 7.70 (d, *J* = 8.4 Hz, 2 H), 7.63 (d, *J* = 7.2 Hz, 1 H), 7.55 (d, *J* = 7.2 Hz, 1 H), 7.54 (d, *J* = 7.2 Hz, 1 H), 7.45 (d, *J* = 8.4 Hz, 2 H); <sup>13</sup>C NMR (CDCl<sub>3</sub>, 100 MHz) δ (ppm): 154.4, 151.6, 137.4, 134.9, 132.3, 131.7, 131.2, 131.1, 130.0, 129.2, 128.9, 126.6, 125.8, 123.9, 123.6, 121.5, 120.9, 120.2, 118.5, 115.8; IR (KBr, cm<sup>-1</sup>): 2925, 1645, 1500, 1419, 1256, 1200, 967, 879, 768; MS (EI) (m/z): 461.0 [(M+2)<sup>+</sup>].

### Copies of NMR Spectroscopies

(E)-N-(1-(p-methoxyphenyl)naphtho[2,1-b]furan-2-yl)-1-(p-tolyl)methanimine (**4a**)

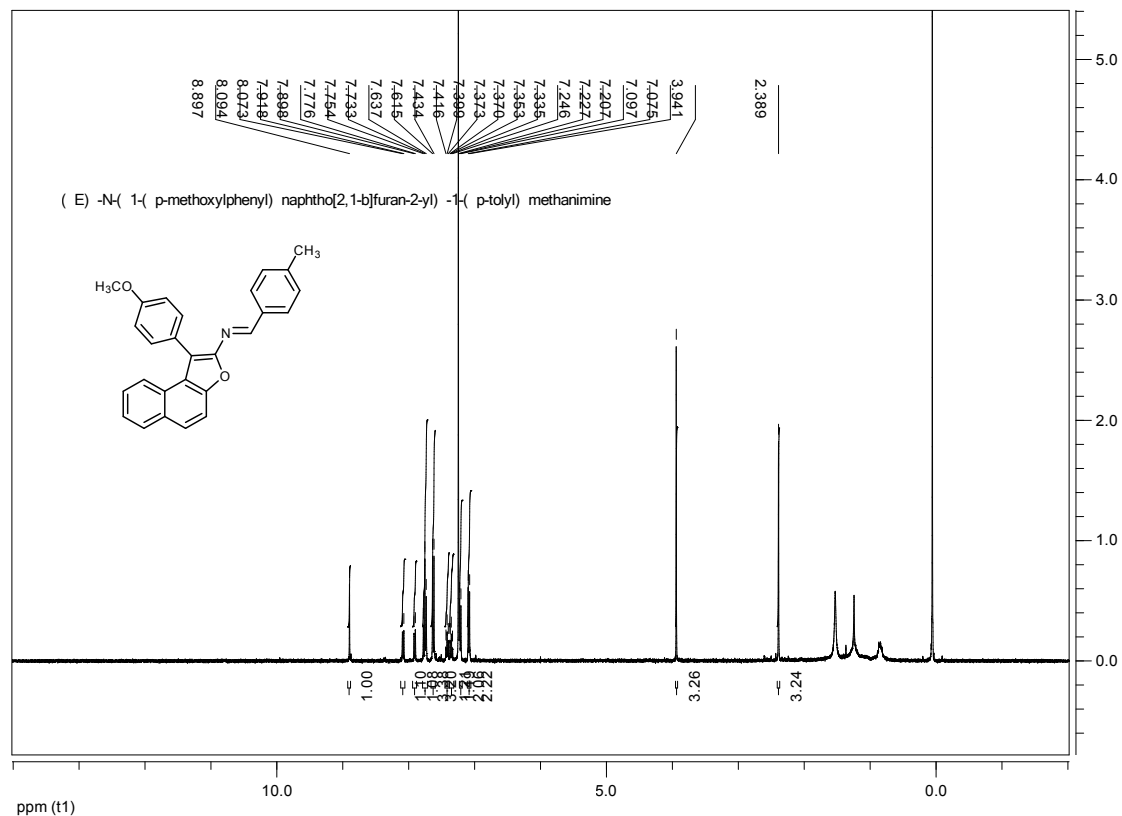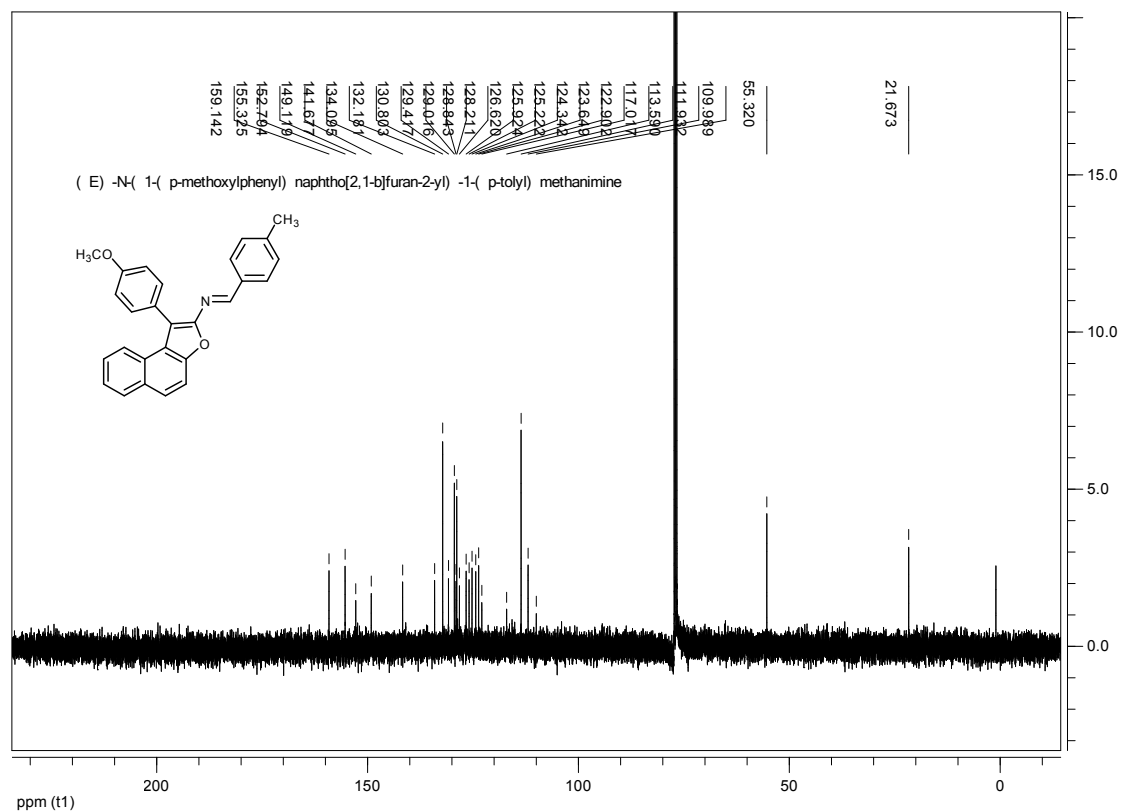

(E)-1-(4-chlorophenyl)-N-(1-(3-methoxyphenyl)naphtho[2,1-b]furan-2-yl)methanimine (**4b**)

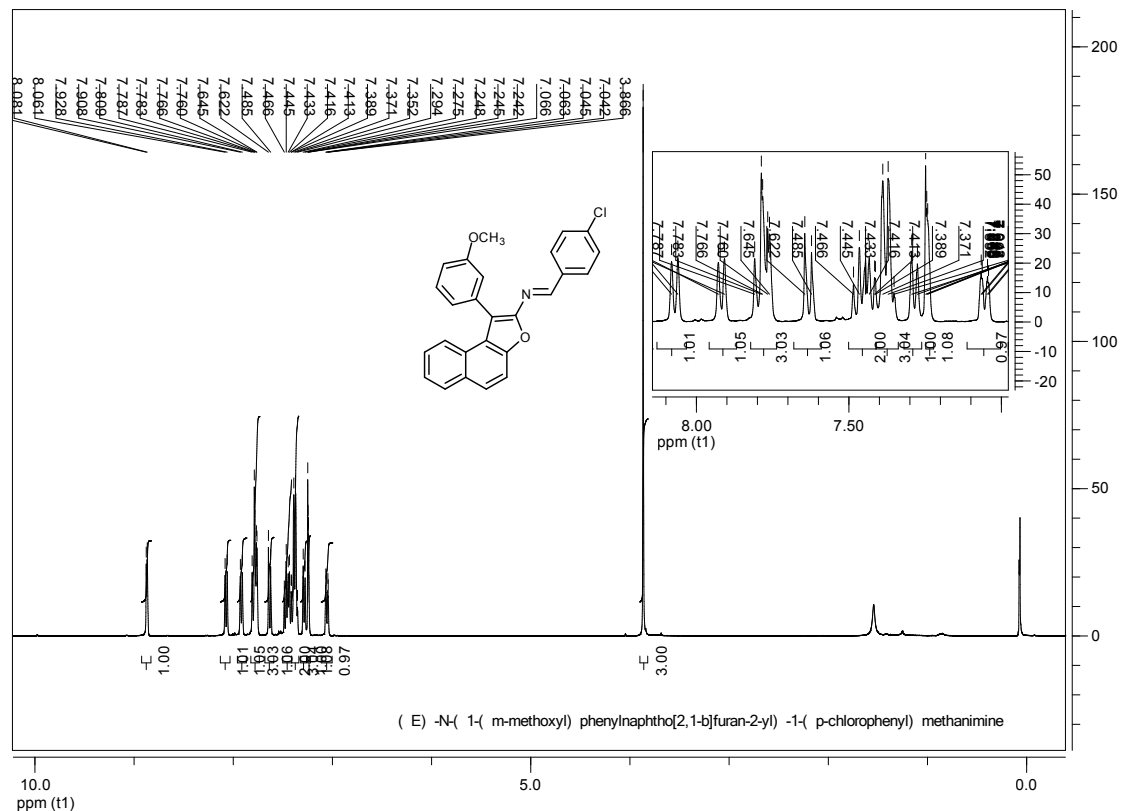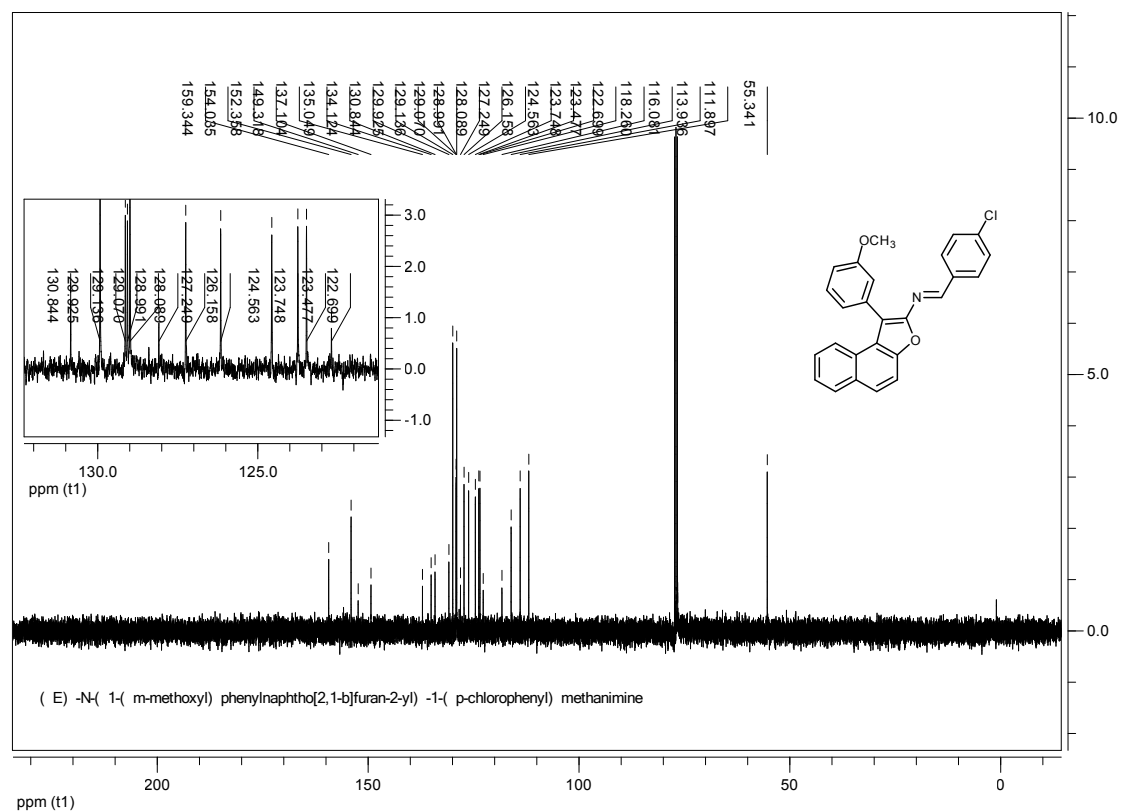

(E)-1-(3-bromophenyl)-N-(1-(4-bromophenyl)naphtho[2,1-b]furan-2-yl)methanimine  
(4c)

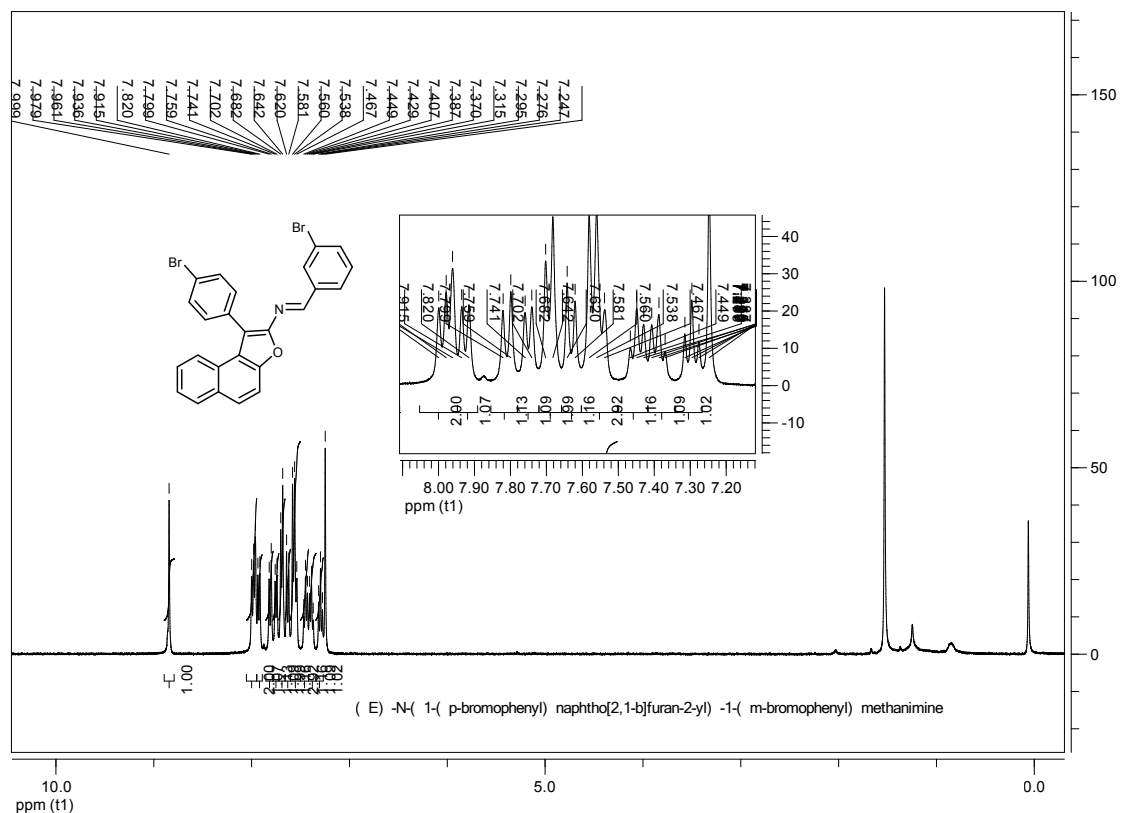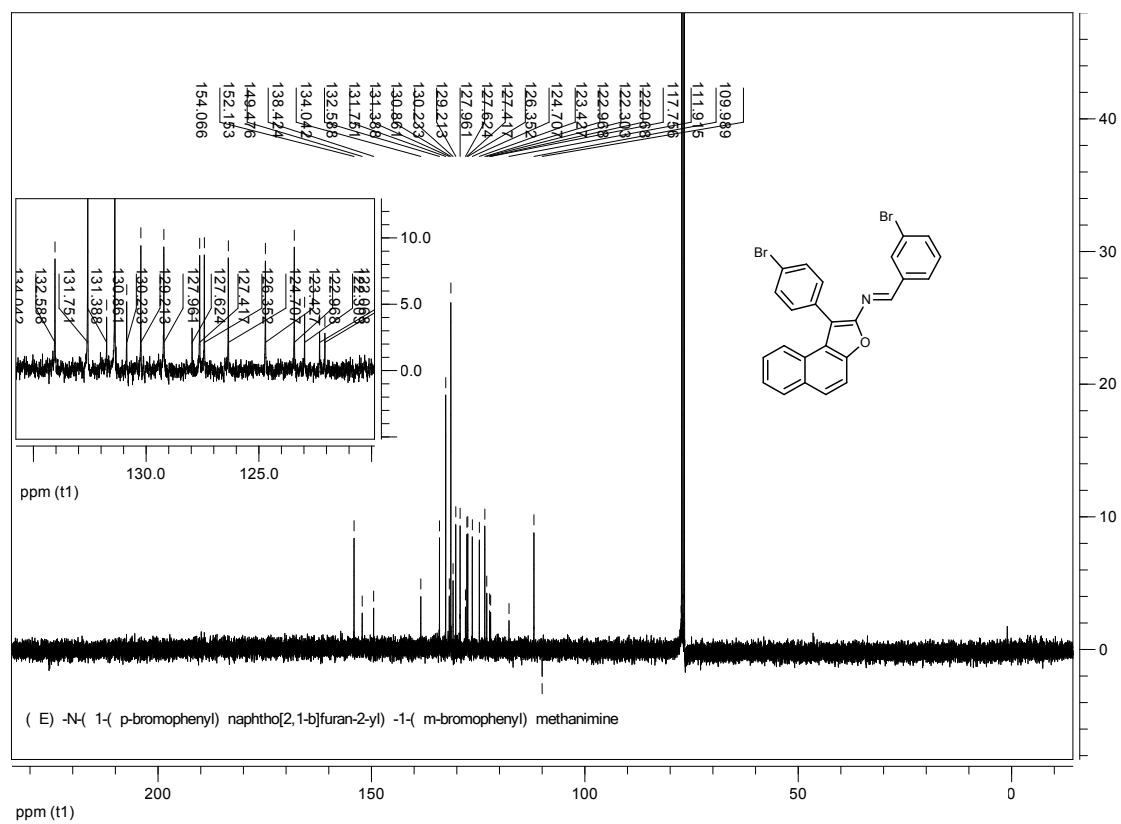

(E)-N-(1-(p-bromophenyl)naphtho[2,1-b]furan-2-yl)-1-(p-tolyl)methanimine (**4d**)

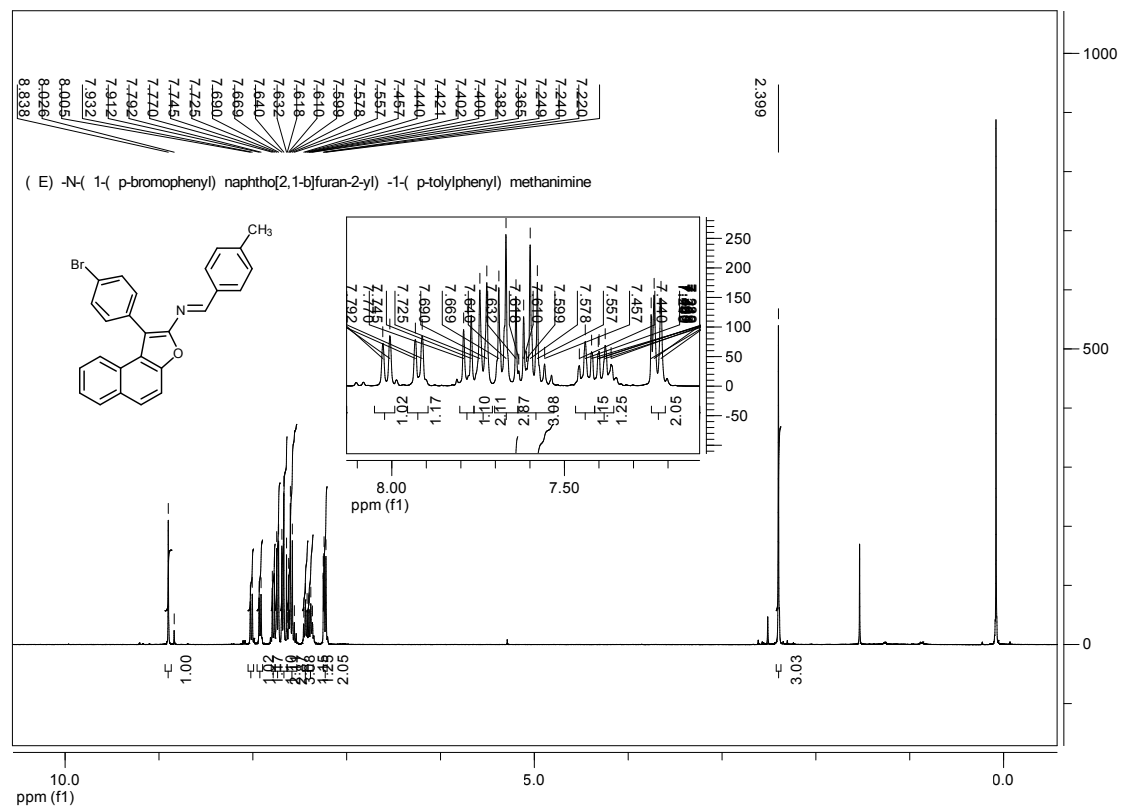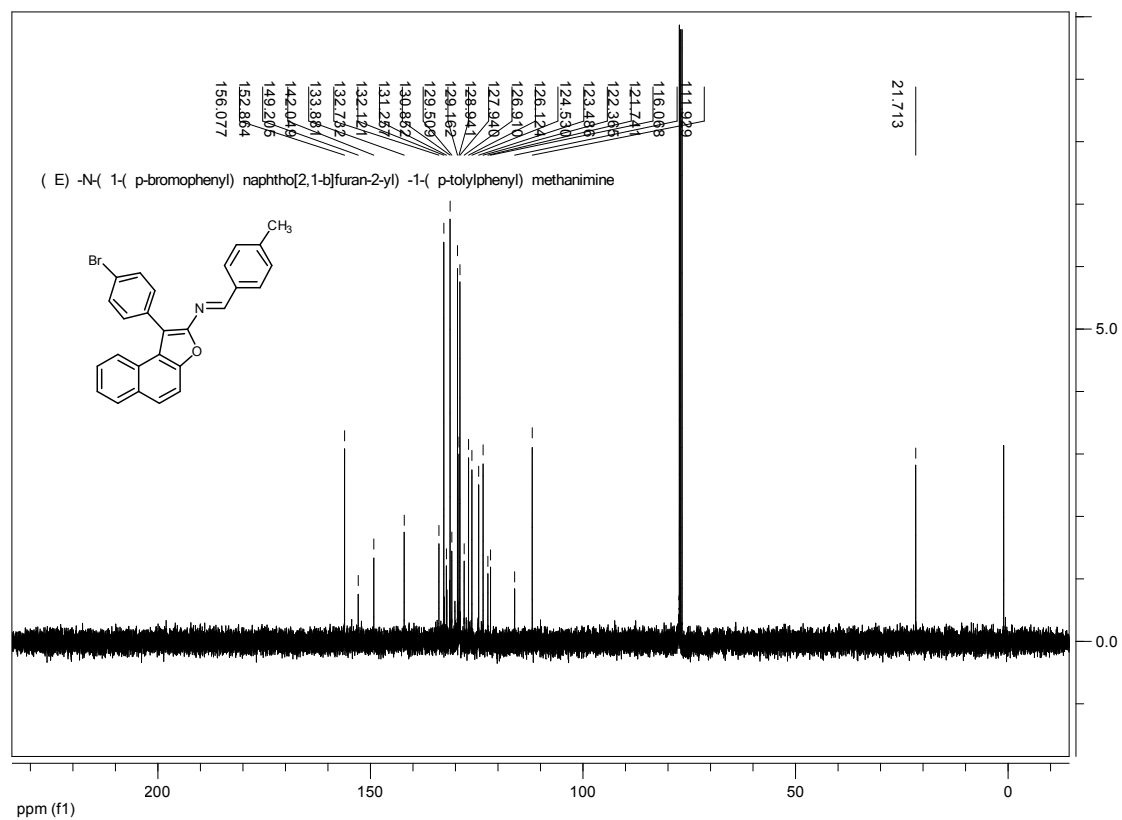

(E)-N-(7-bromo-1-(*p*-tolyl)naphtho[2,1-*b*]furan-2-yl)-1-(2-chlorophenyl)methanimine (**4e**)

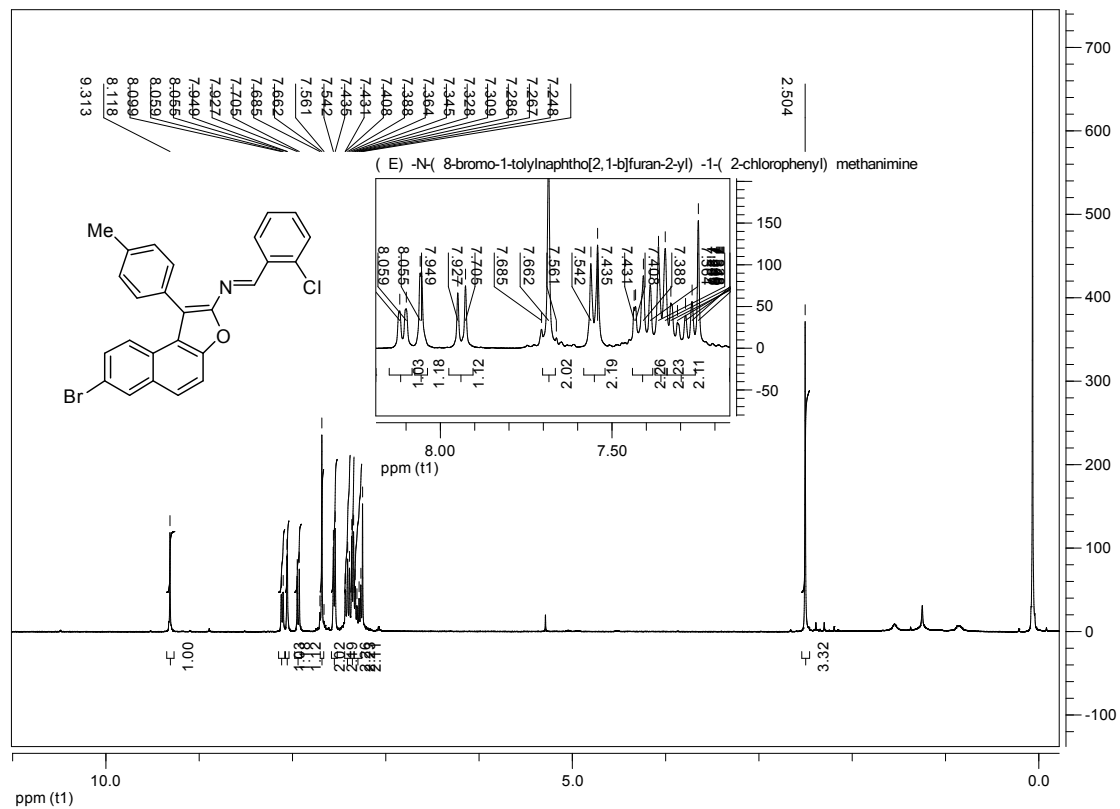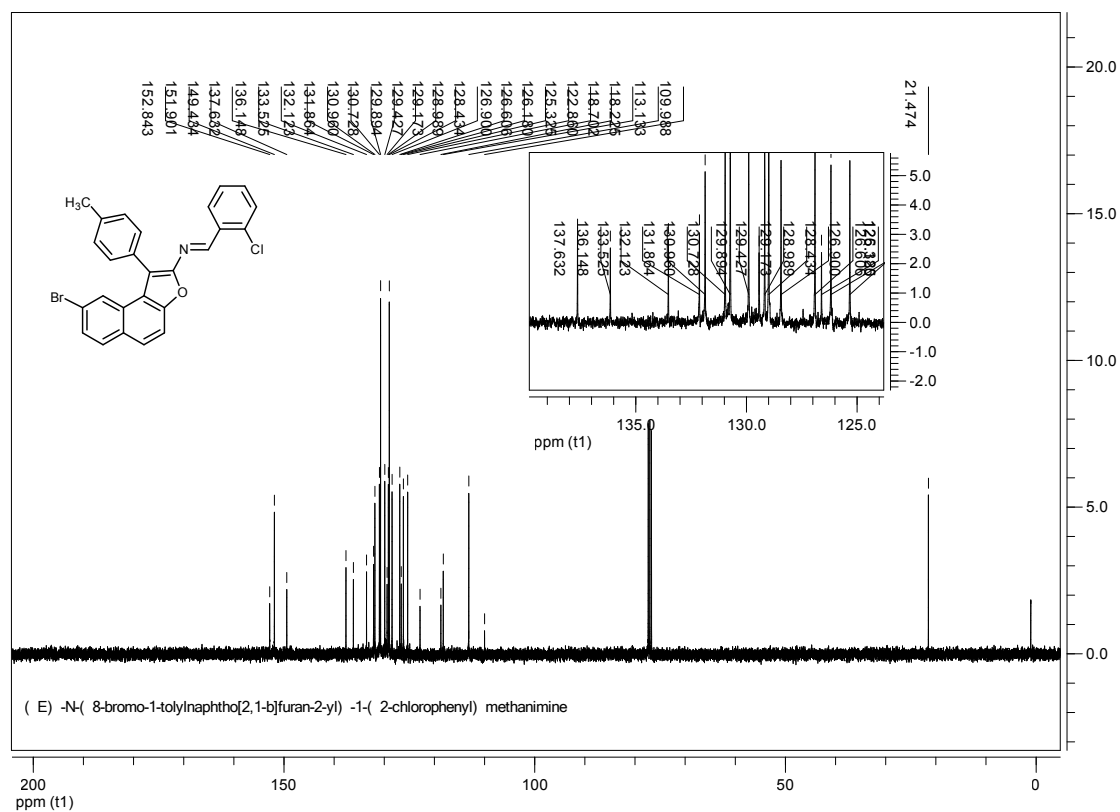

(E)-N-(1-(p-bromophenyl)naphtho[2,1-b]furan-2-yl)-1-(p-methoxyphenyl)ethanimine (**4f**)

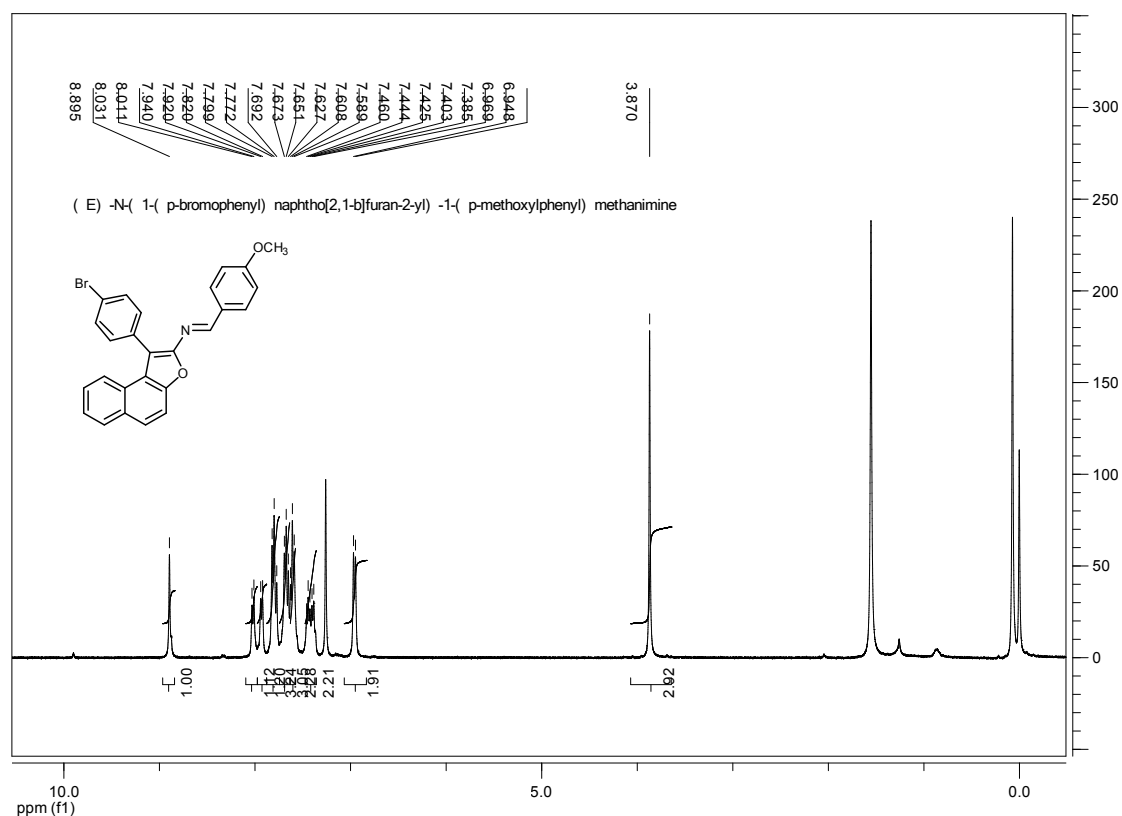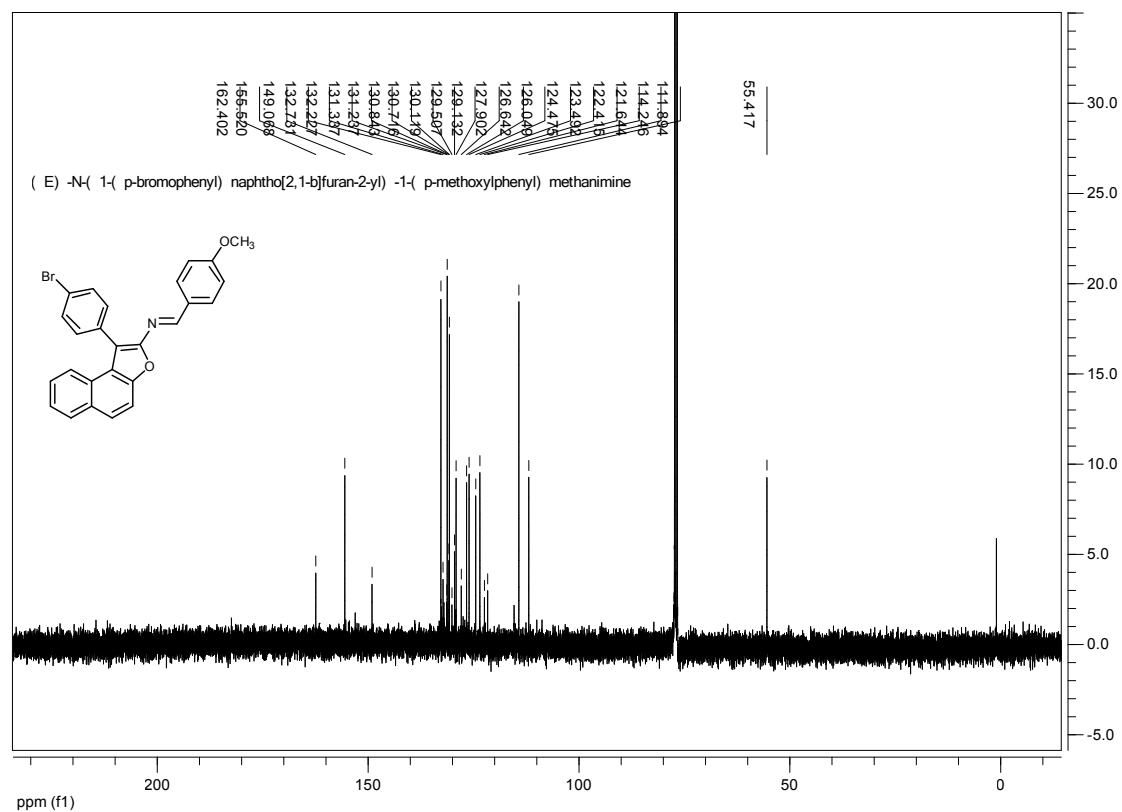



### (E)-N-(7-bromo-1-(p-tolyl)naphtho[2,1-b]furan-2-yl)-1-(p-tolyl)methanimine (4g)

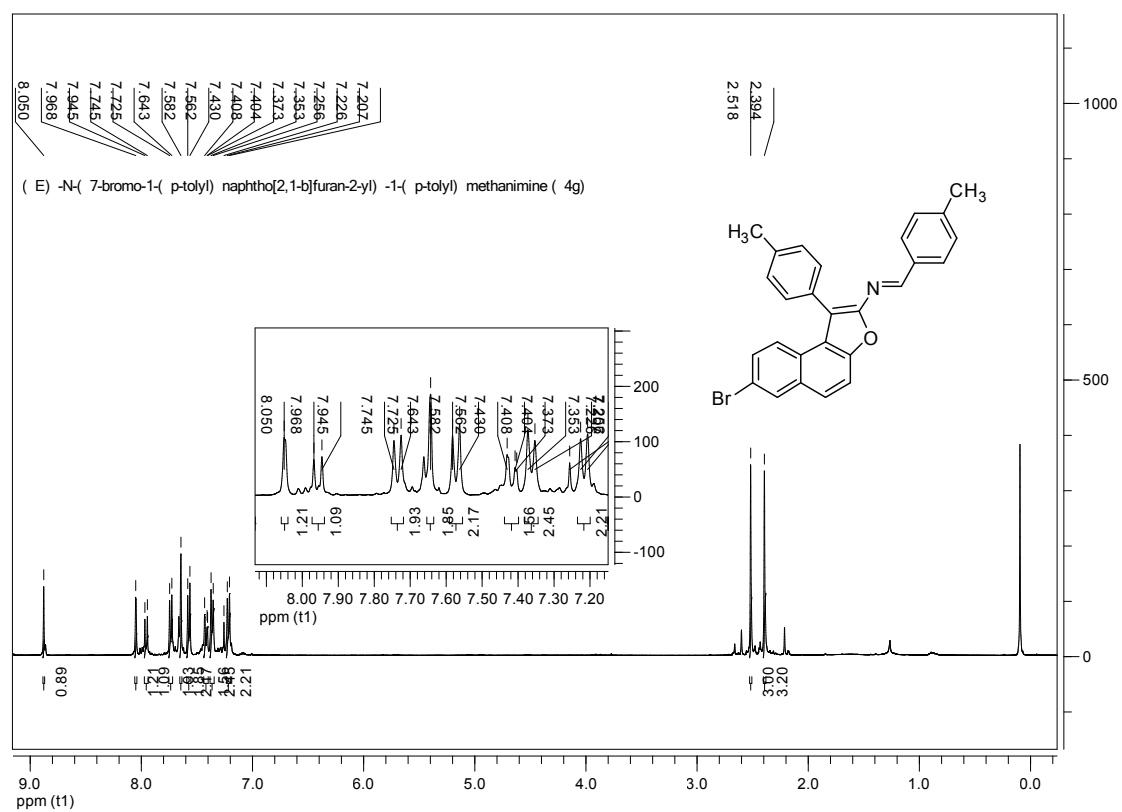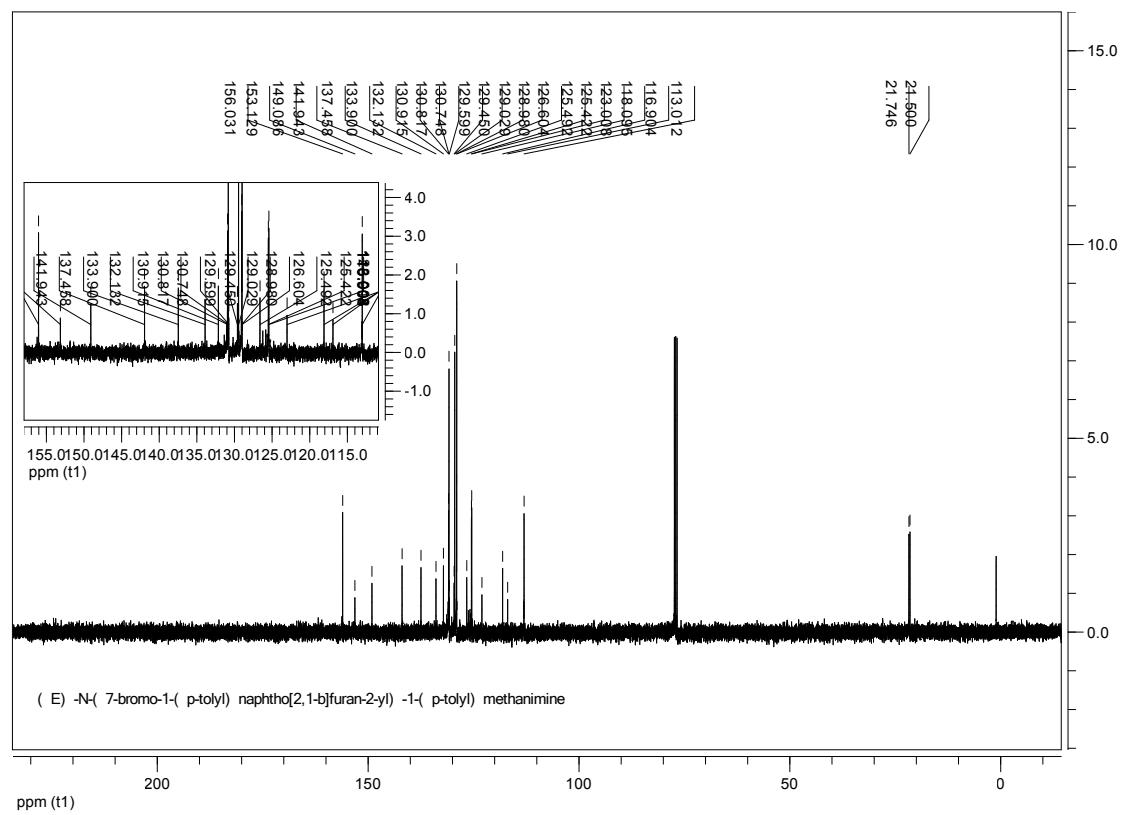

(E)-N-(1-(p-chlorophenyl)naphtho[2,1-b]furan-2-yl)-1-(o-methoxyphenyl)methanimine (**4h**)

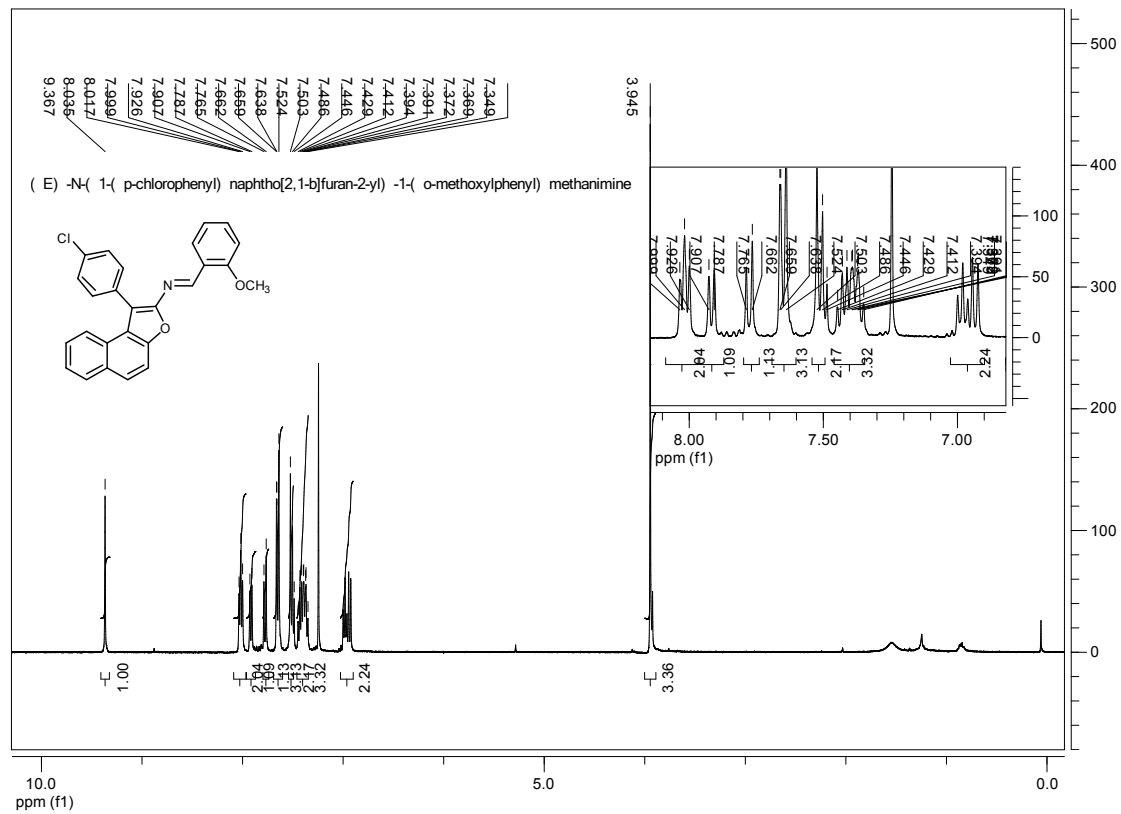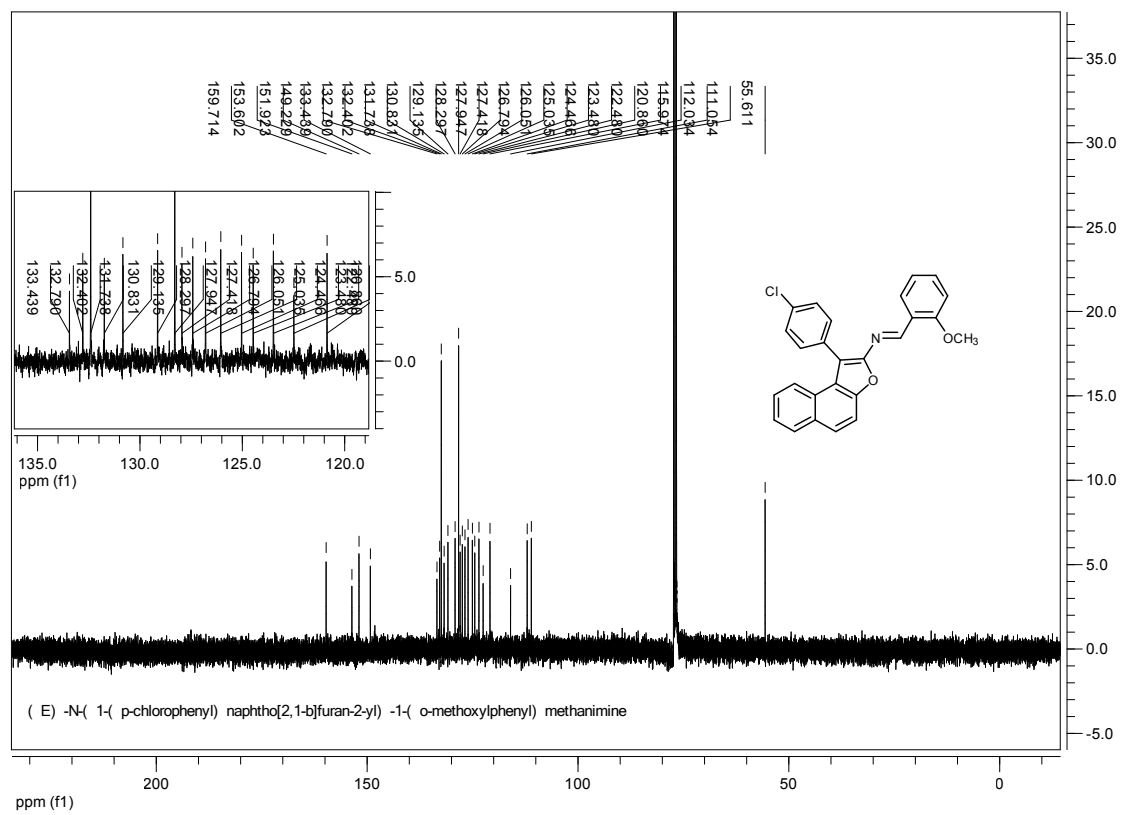

(E)-N-(1-(p-chlorophenyl)naphtho[2,1-b]furan-2-yl)-1-(p-tolyl)methanimine (**4i**)

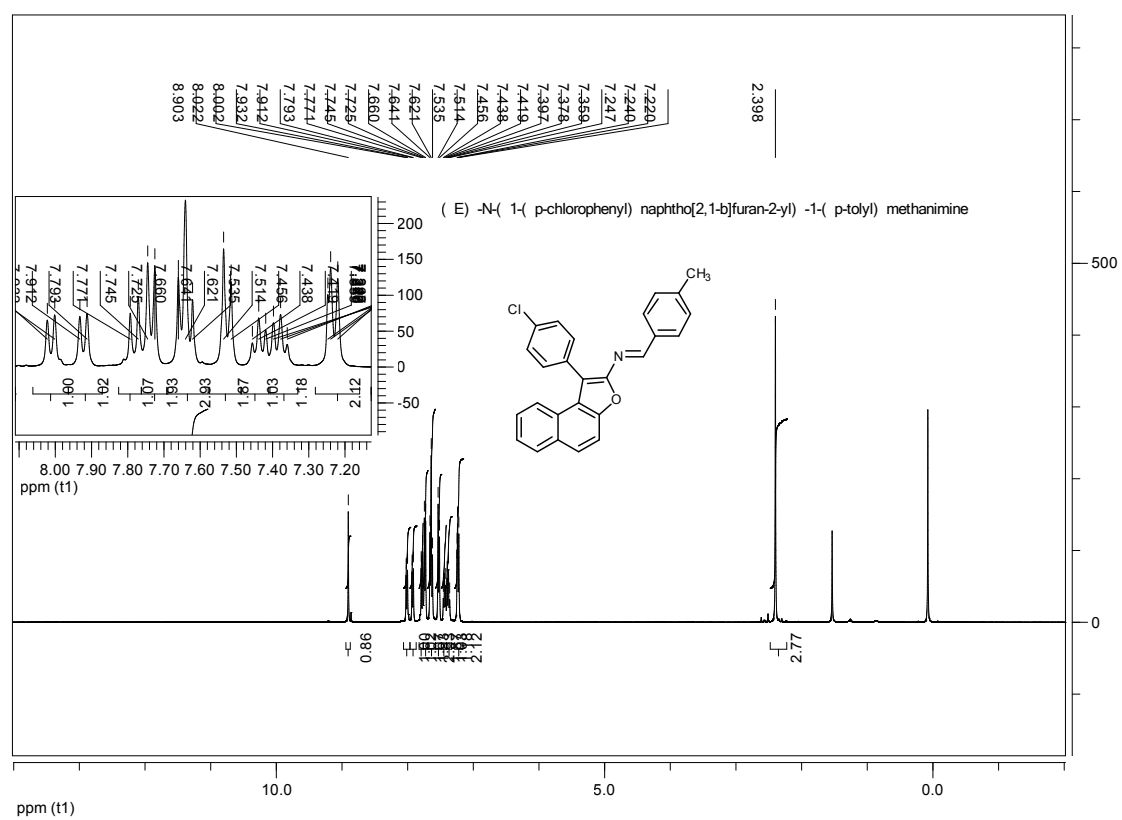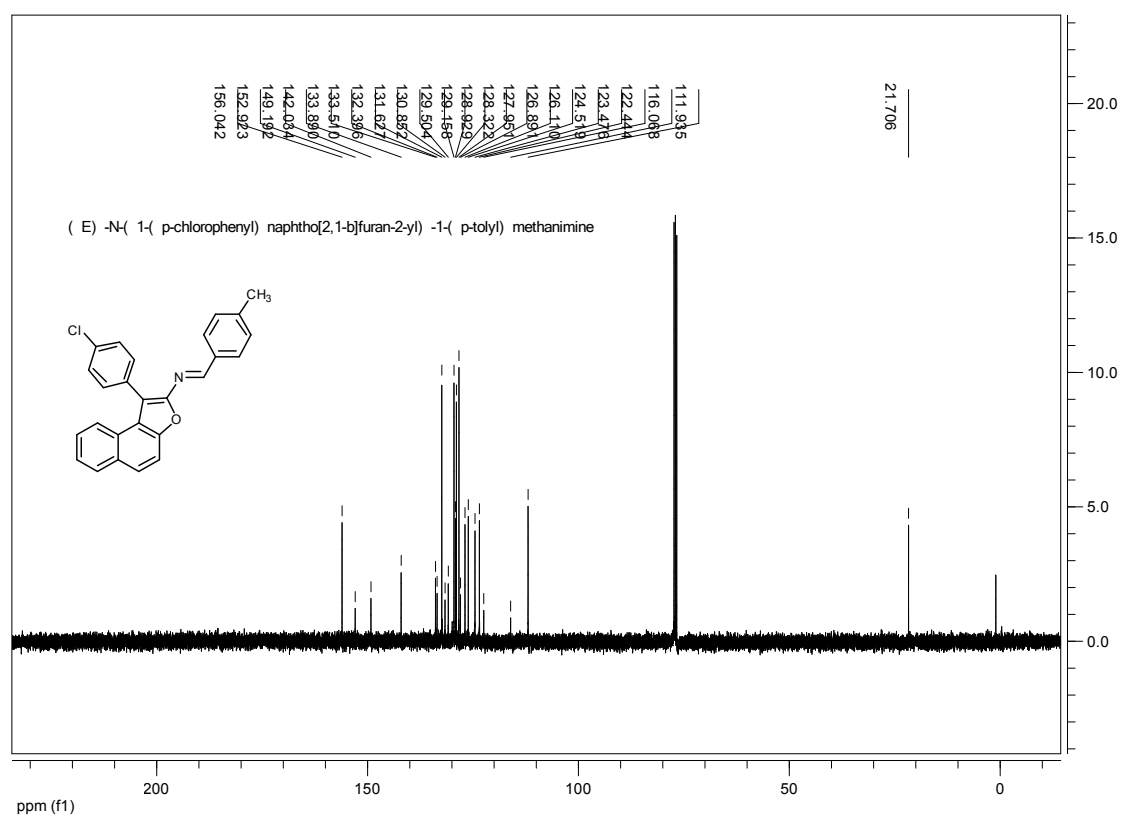

(E)-1-(4-methoxyphenyl)-N-(1-(4-nitrophenyl)naphtho[2,1-b]furan-2-yl)methanimine  
**(4j)**

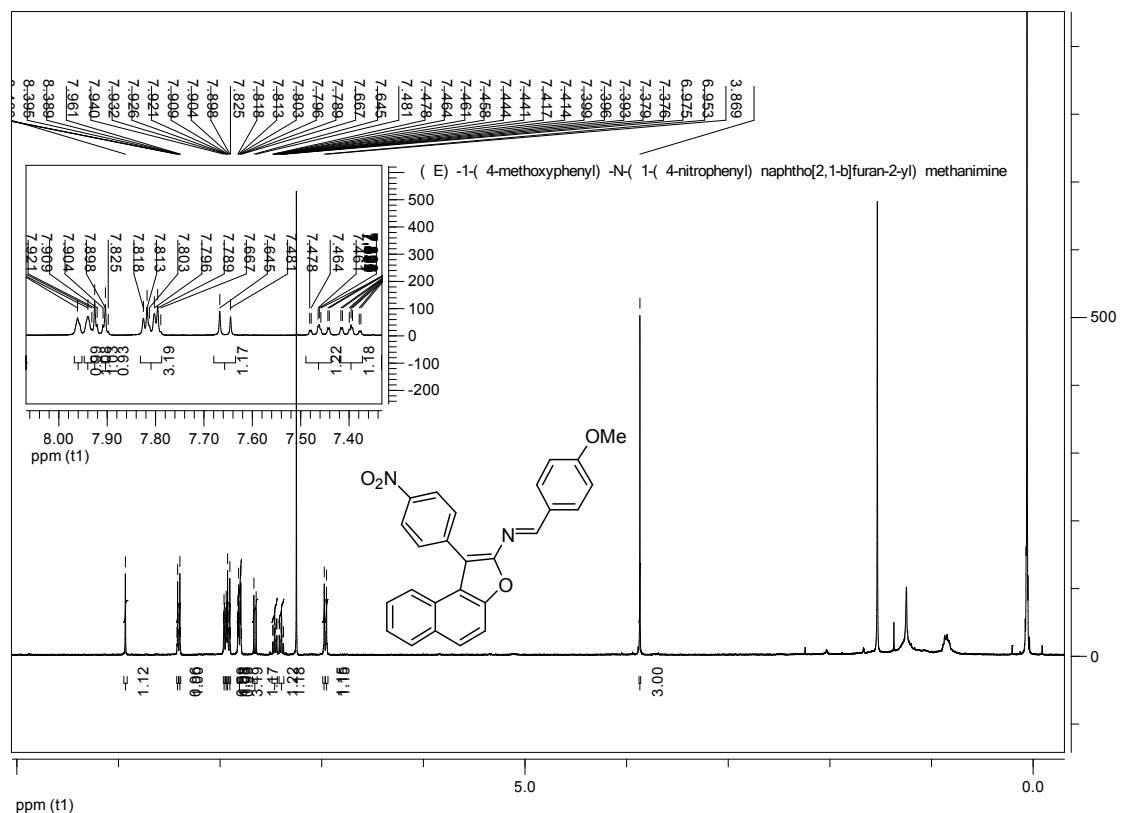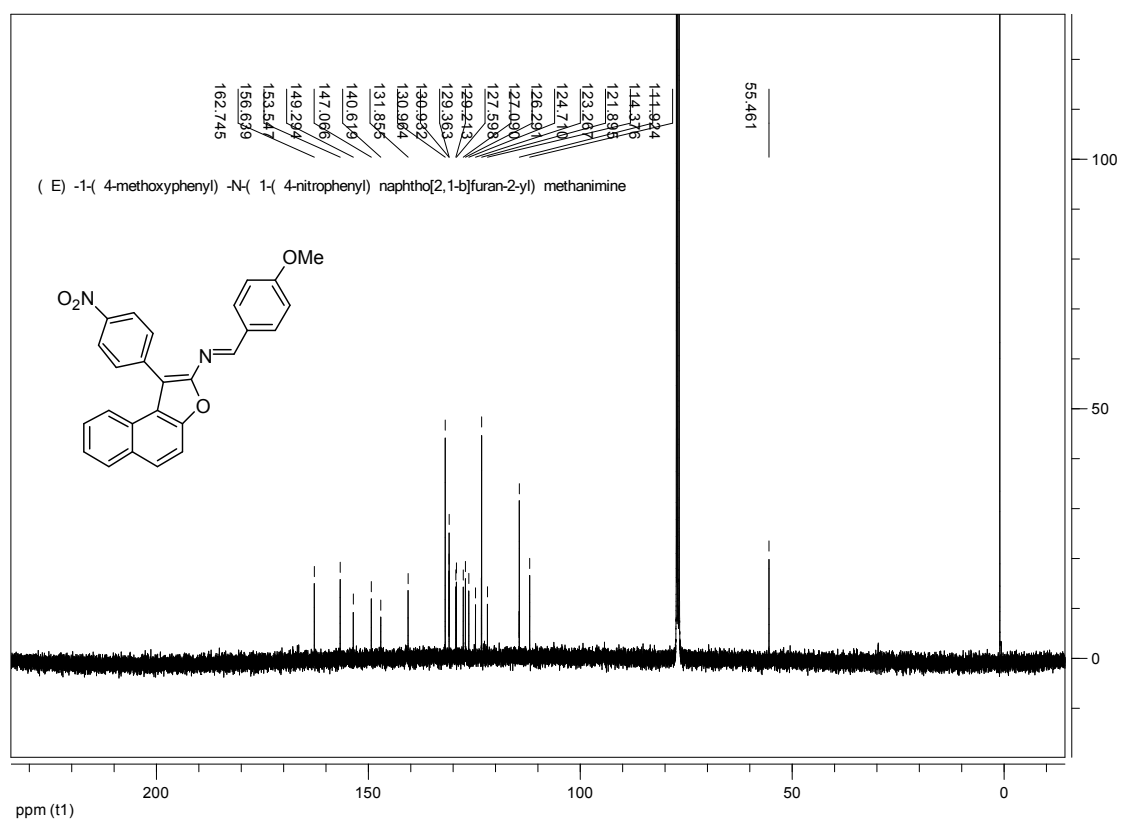

(E)-N-(1-(p-methoxyphenyl)naphtho[2,1-b]furan-2-yl)-1-(o-chlorophenyl)methanimine (**4k**)

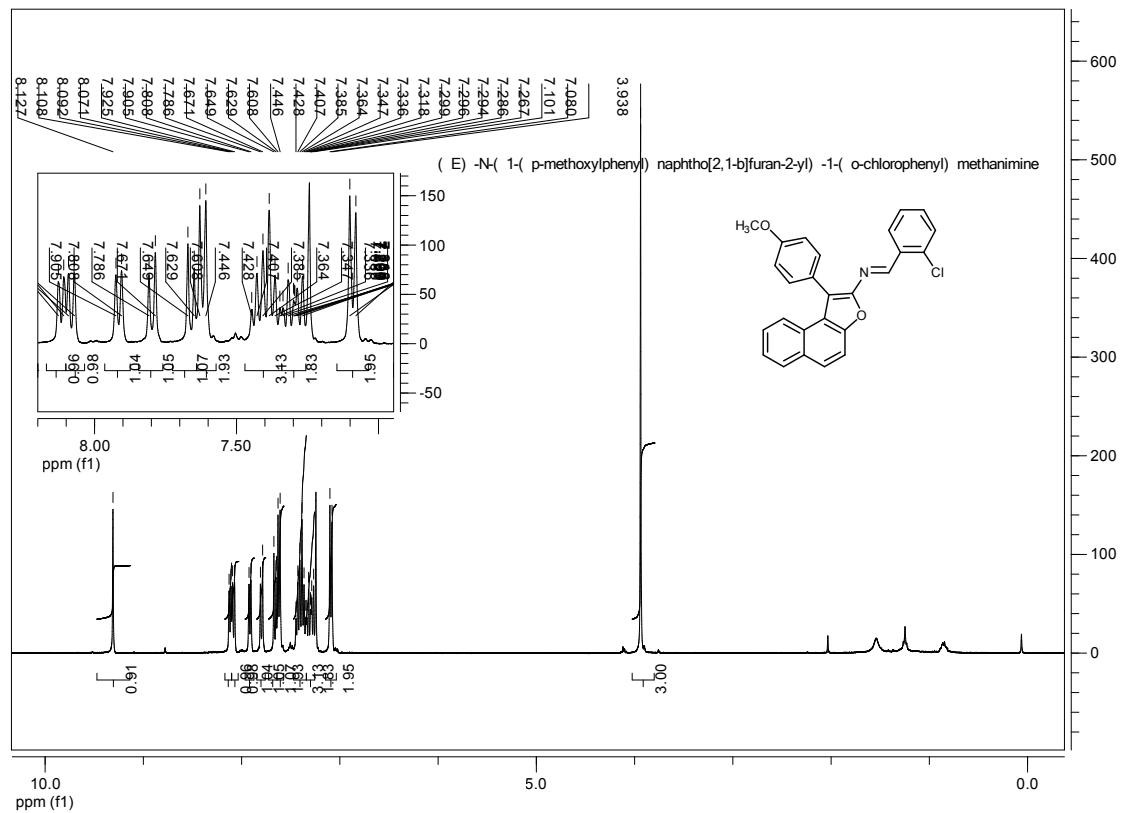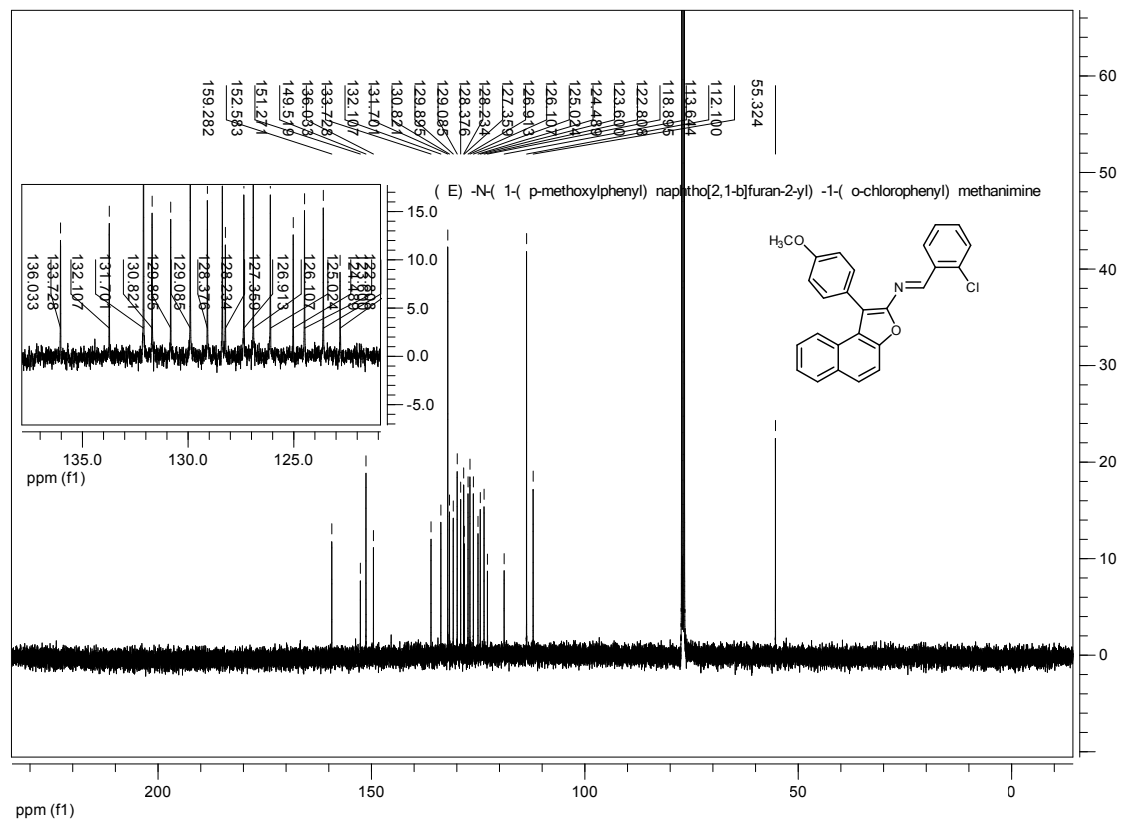

(E)-N-(7-bromo-1-(4-chlorophenyl)naphtho[2,1-b]furan-2-yl)-1-(3-phenoxyphenyl)methanimine (**41**)

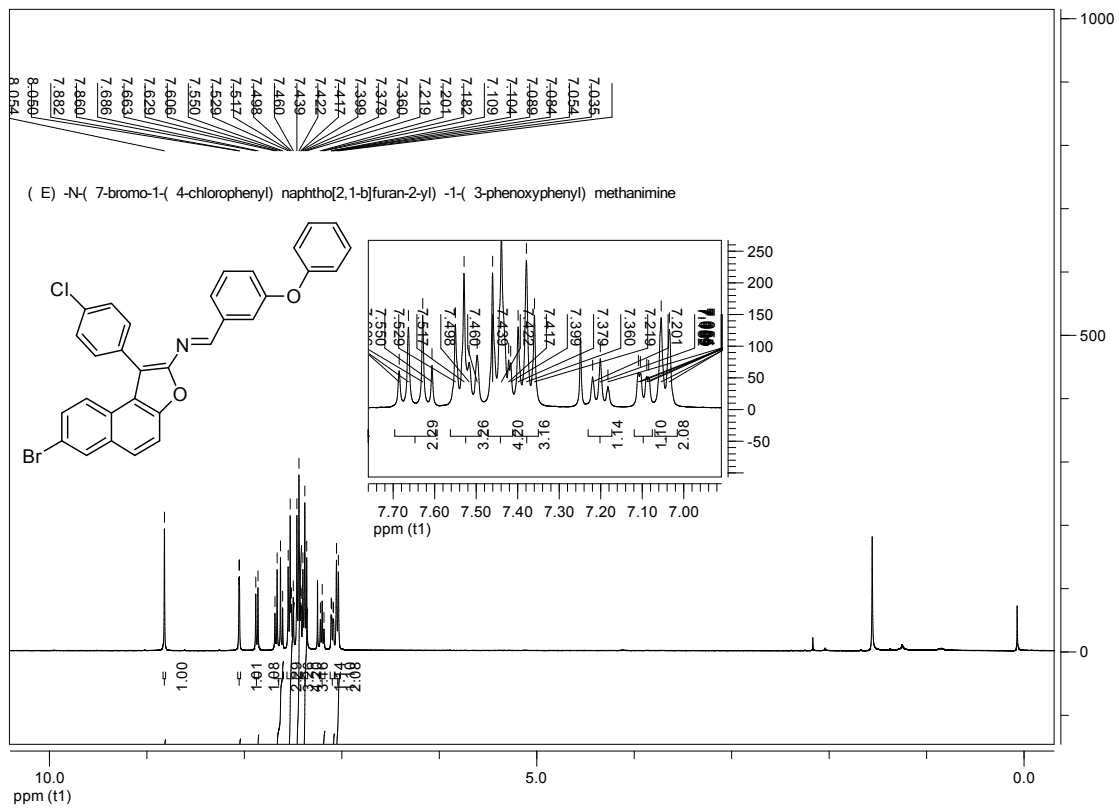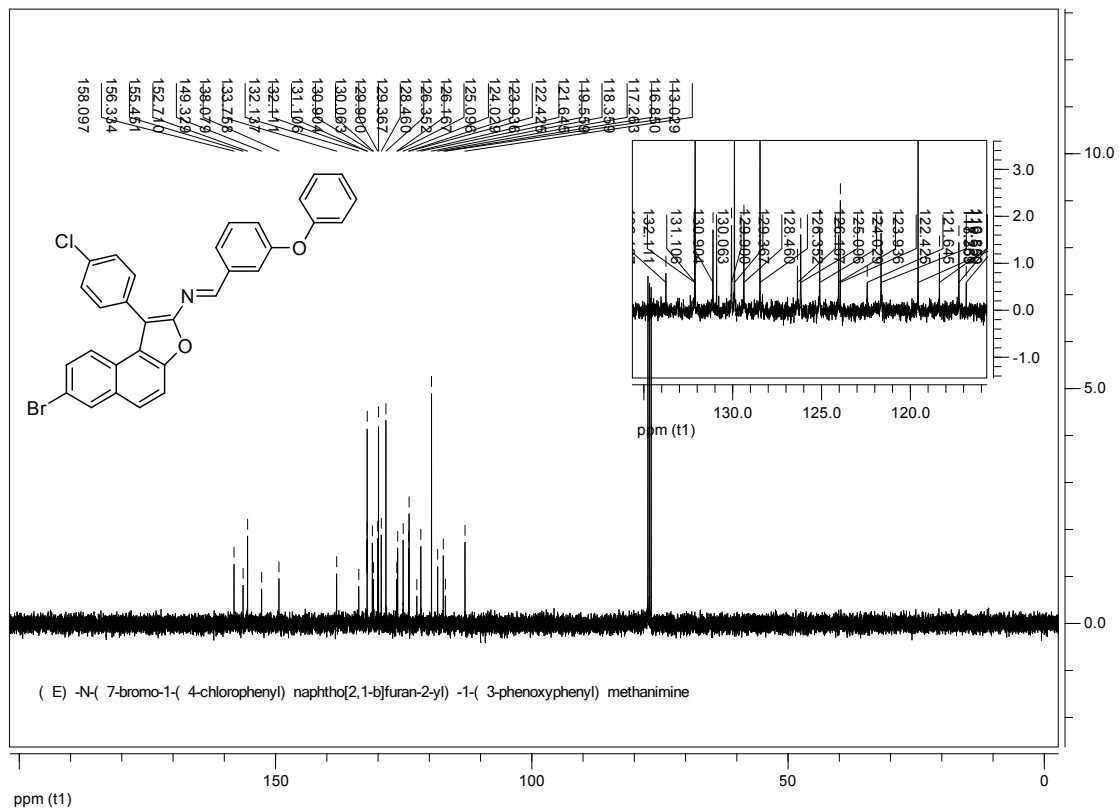

(E)-N-(1-(p-methoxyphenyl)naphtho[2,1-b]furan-2-yl)-1-(p-methoxyphenyl)methanimine (**4m**)

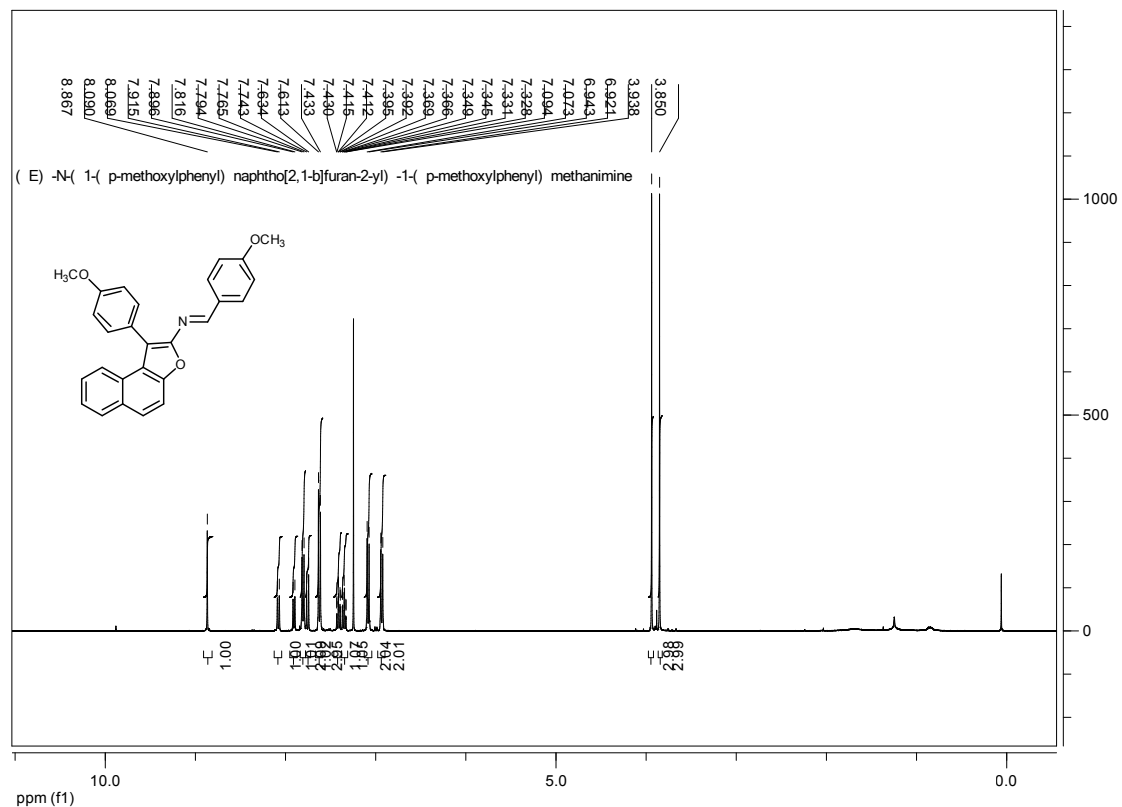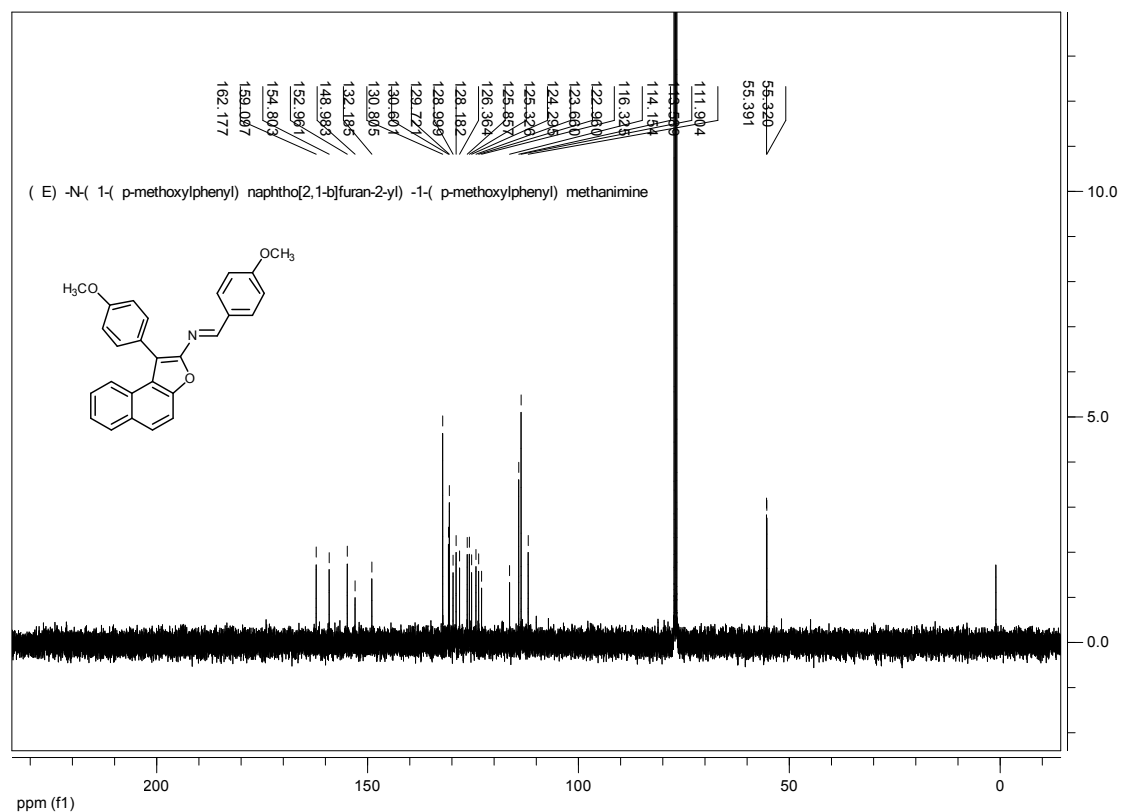

(E)-N-(1-(p-methoxyphenyl)naphtho[2,1-b]furan-2-yl)-1-(thiophen-3-yl)methanimine (4n)

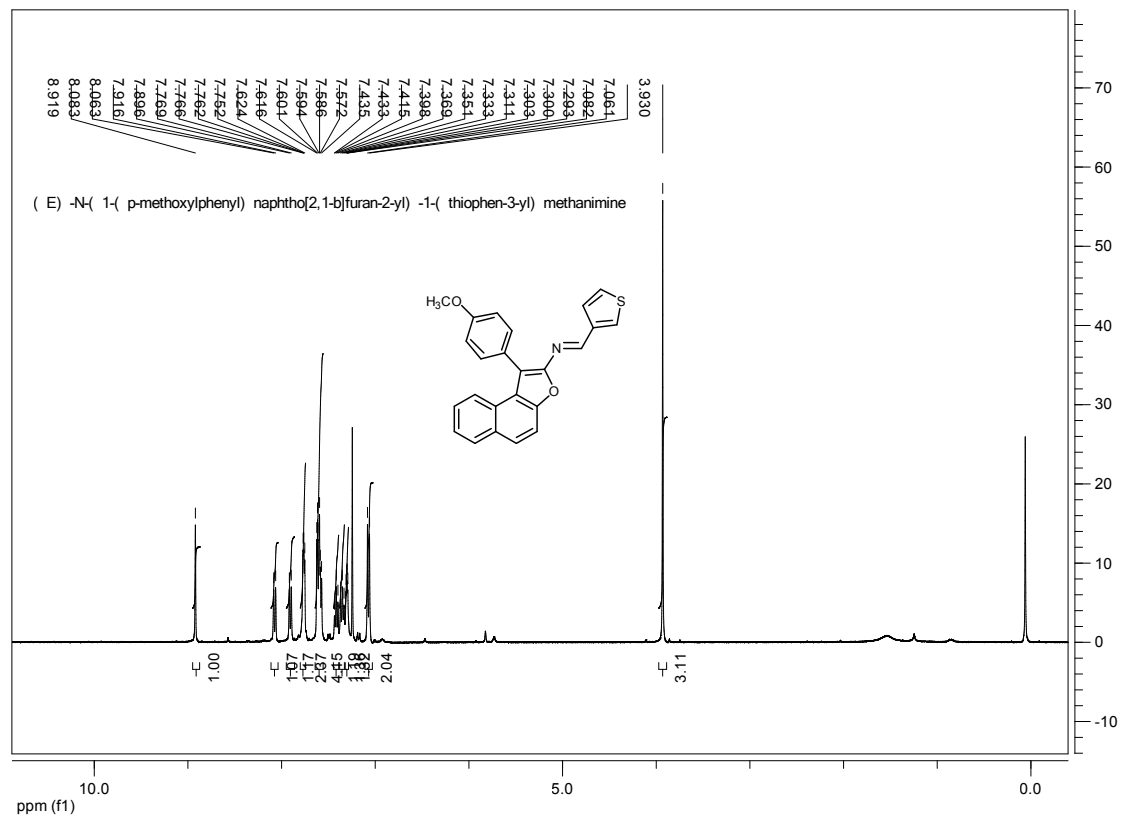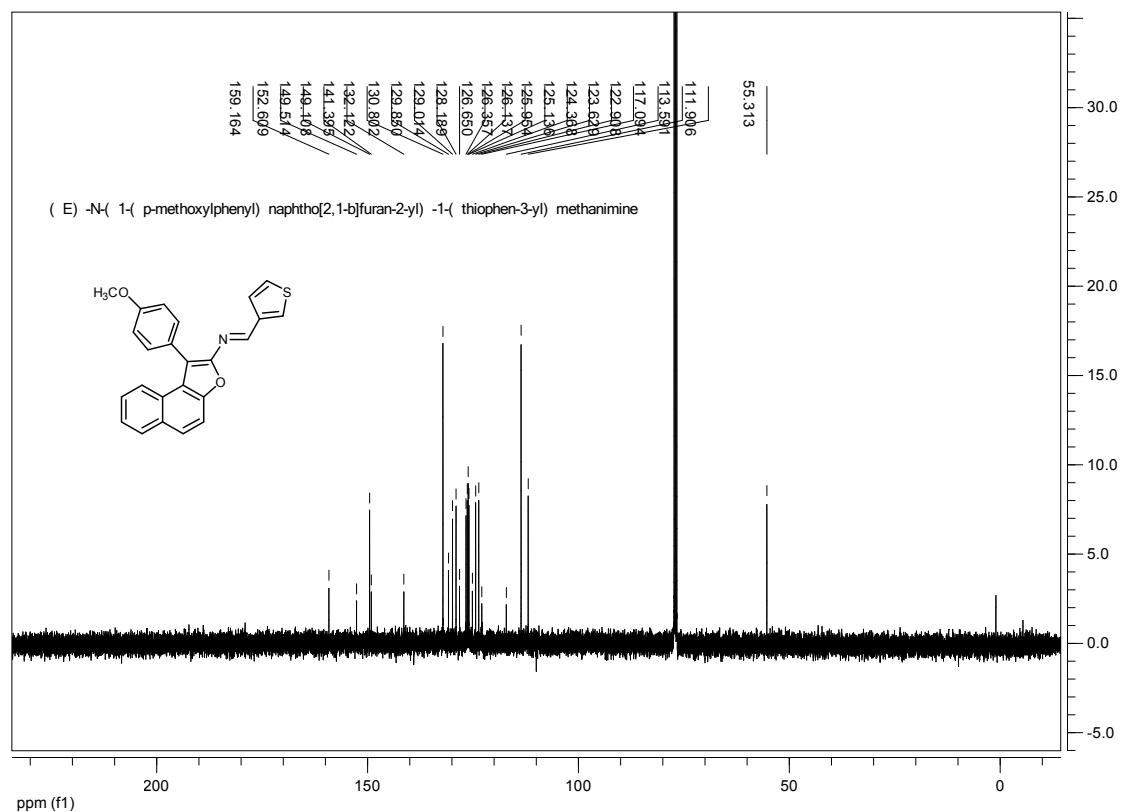









(E)-N-(7-bromo-1-(4-chlorophenyl)naphtho[2,1-b]furan-2-yl)-1-(3-bromophenyl)methanimine (**4r**)

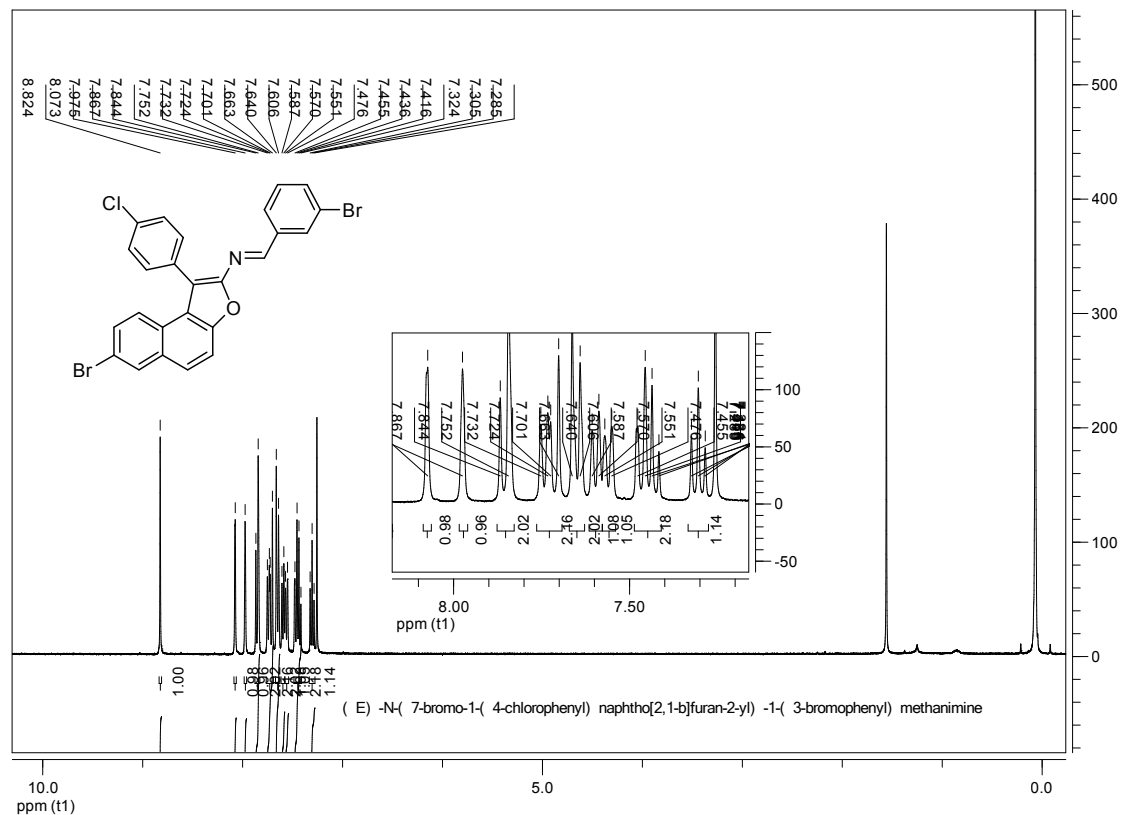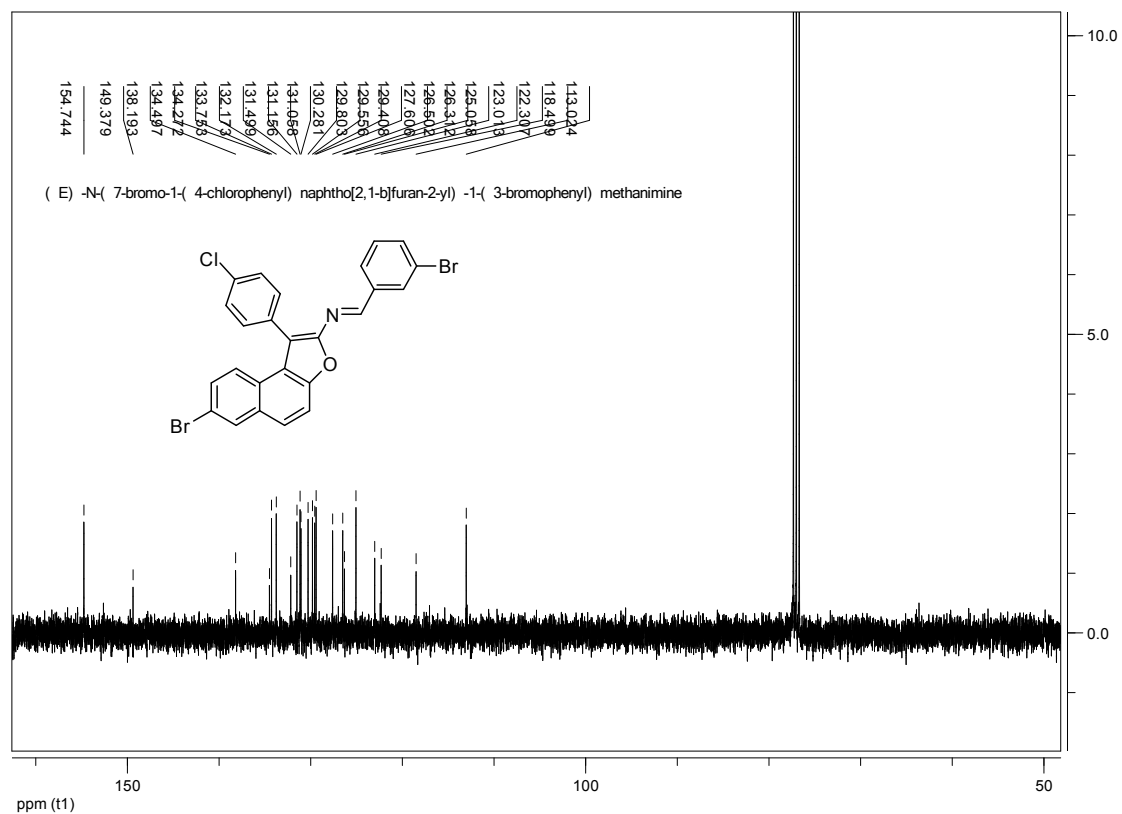

(E)-N-(7-bromo-1-(3-methoxyphenyl)naphtho[2,1-b]furan-2-yl)-1-(p-tolyl)methanimine (4s)

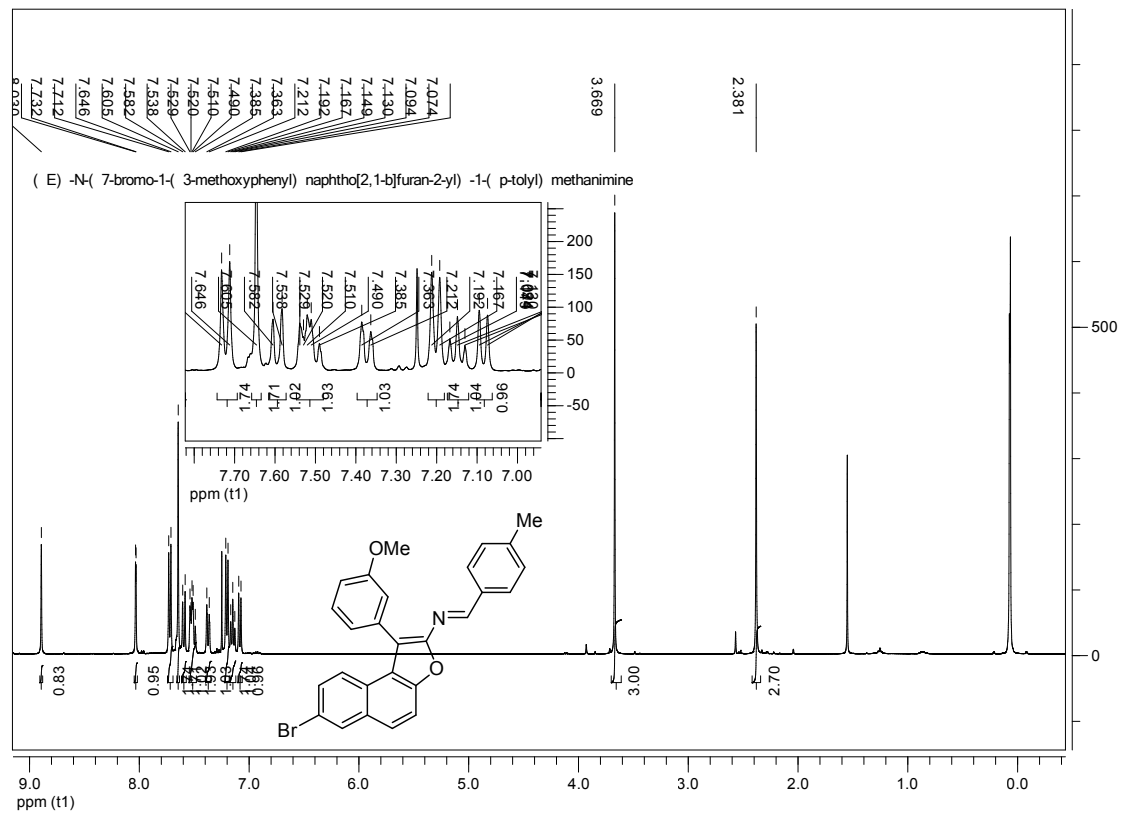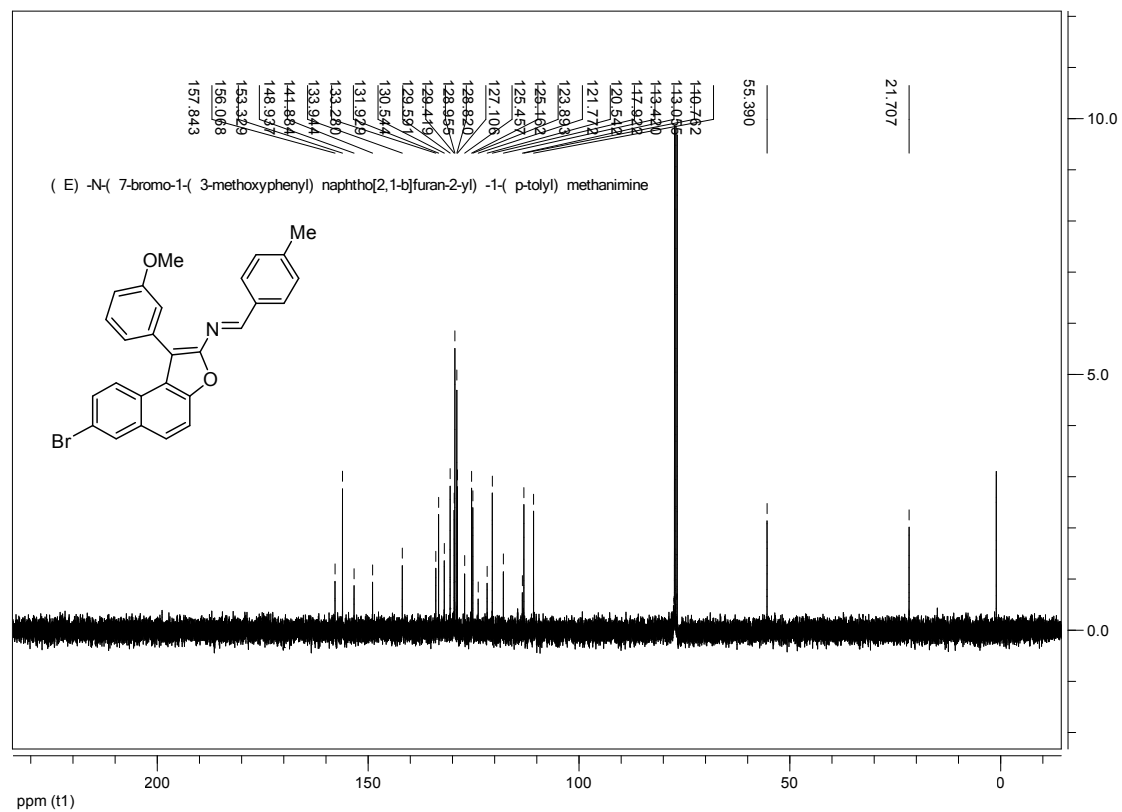

(E)-N-(3-(4-bromophenyl)naphtho[1,2-b]furan-2-yl)-1-(2-methoxyphenyl)methanimine (4t)

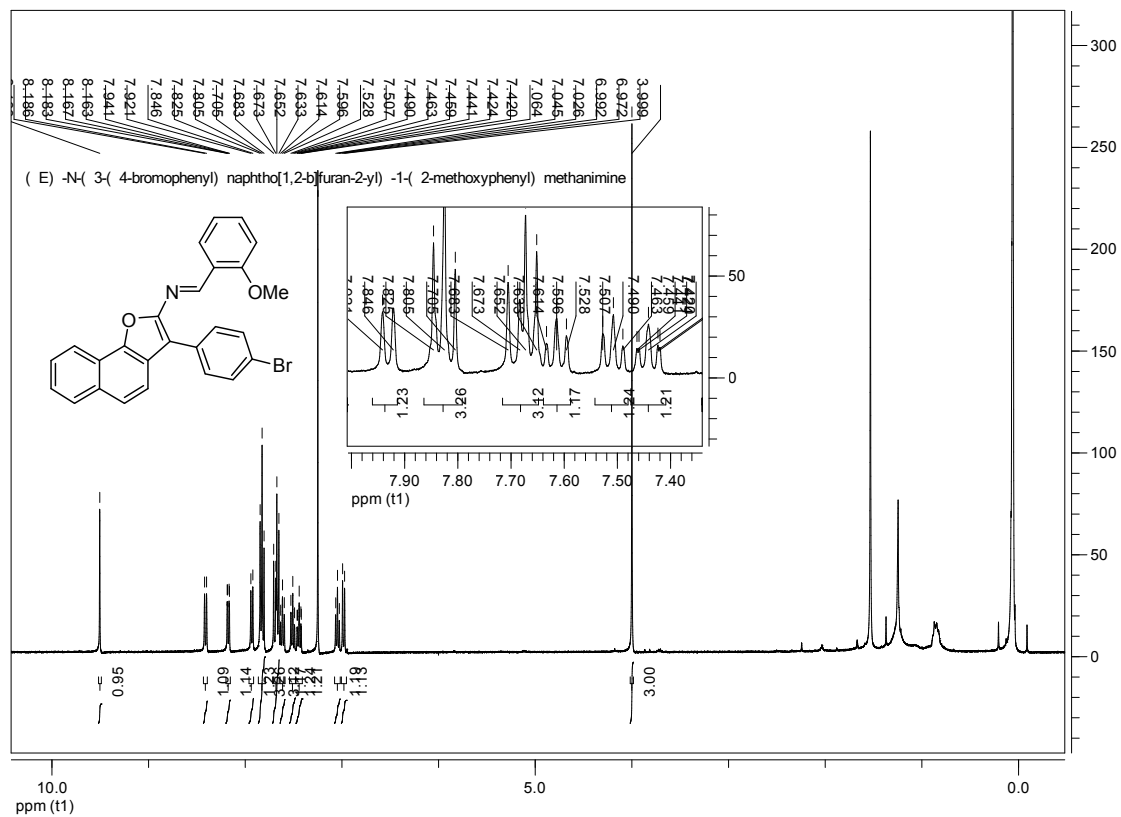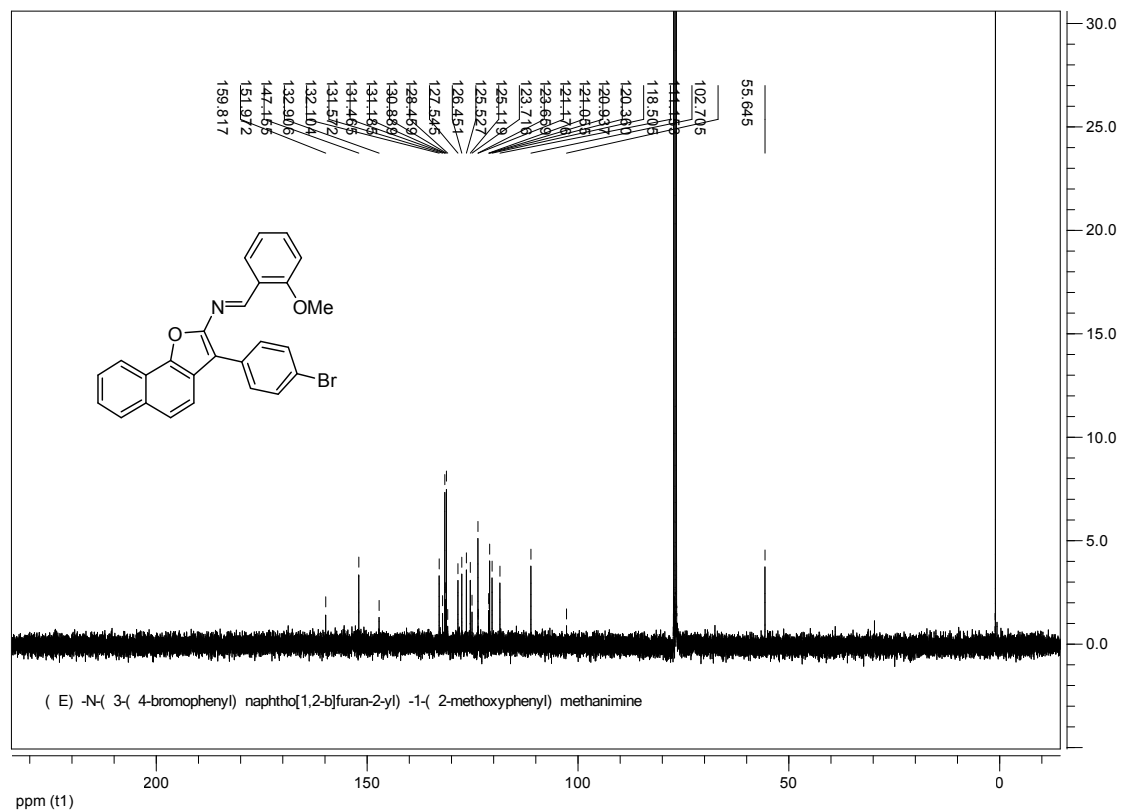

(E)-N-(3-(4-bromophenyl)naphtho[1,2-b]furan-2-yl)-1-(p-tolyl)methanimine (**4u**)

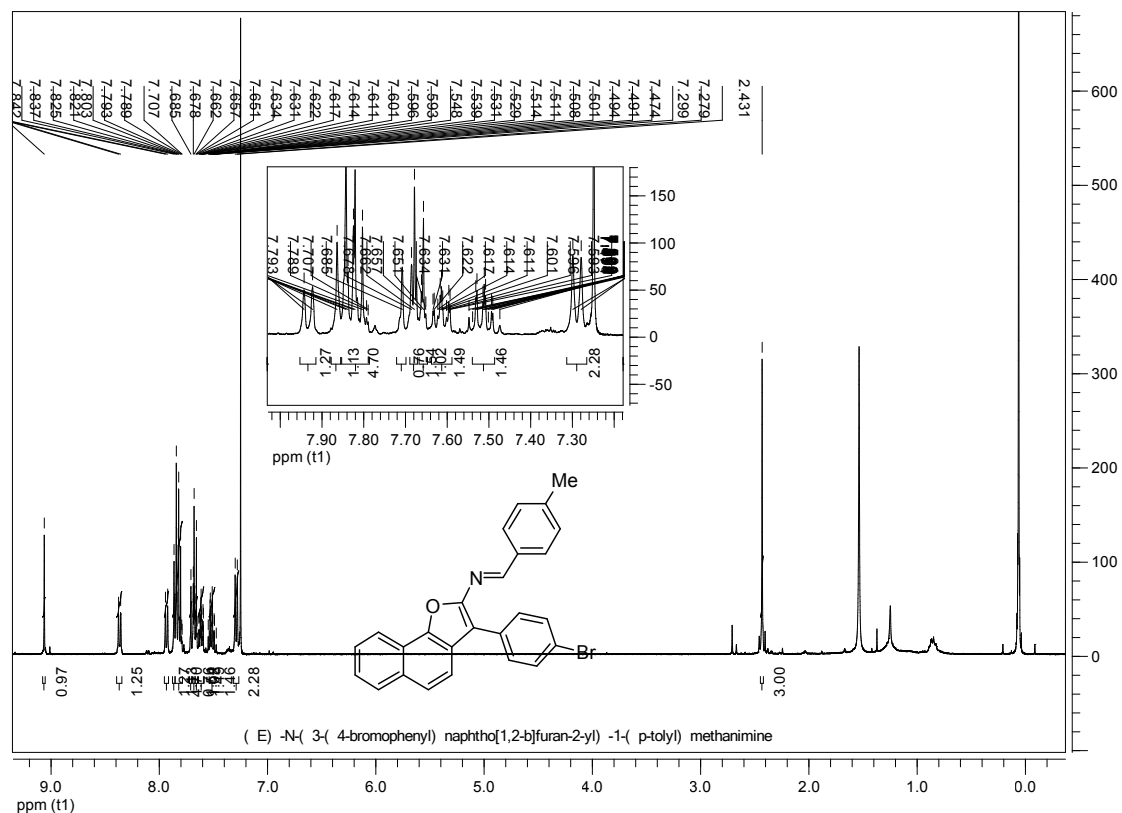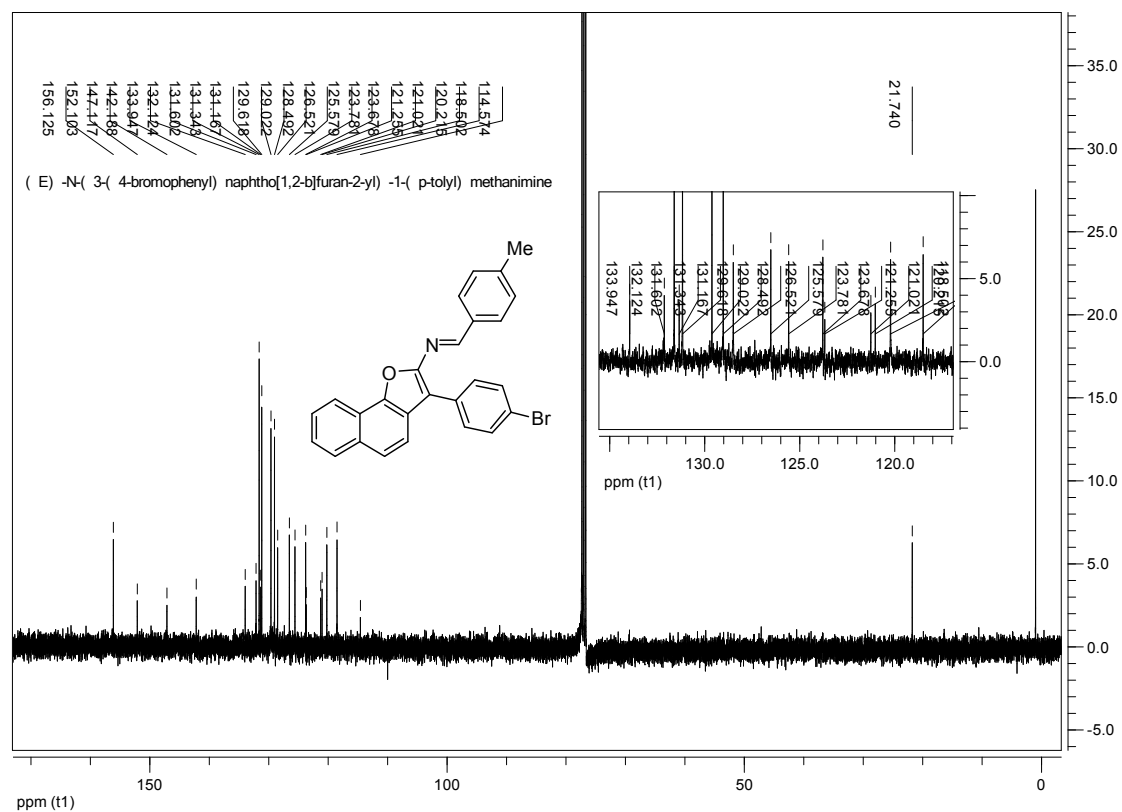





(E)-1-(4-bromophenyl)-N-(3-(4-methoxyphenyl)naphtho[1,2-b]furan-2-yl)methanimine (4w)

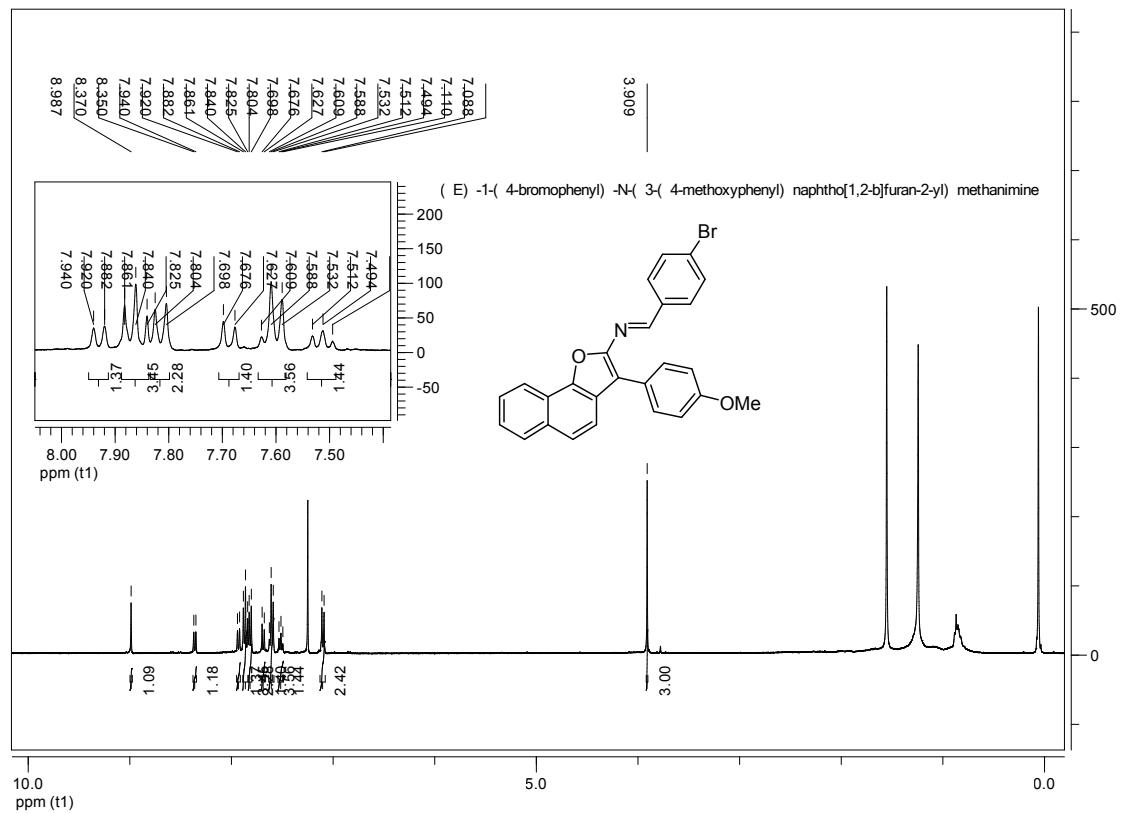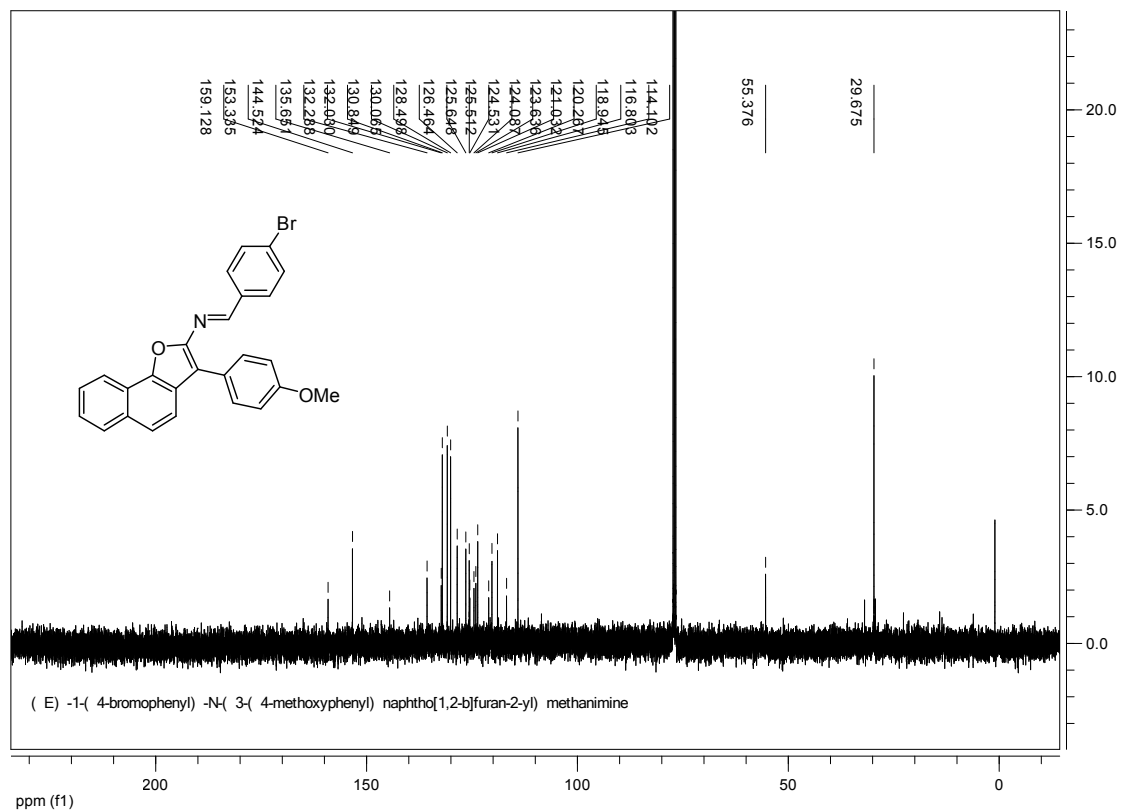

(E)-1-(4-bromophenyl)-N-(3-(4-chlorophenyl)naphtho[1,2-b]furan-2-yl)methanimine  
**(4x)**

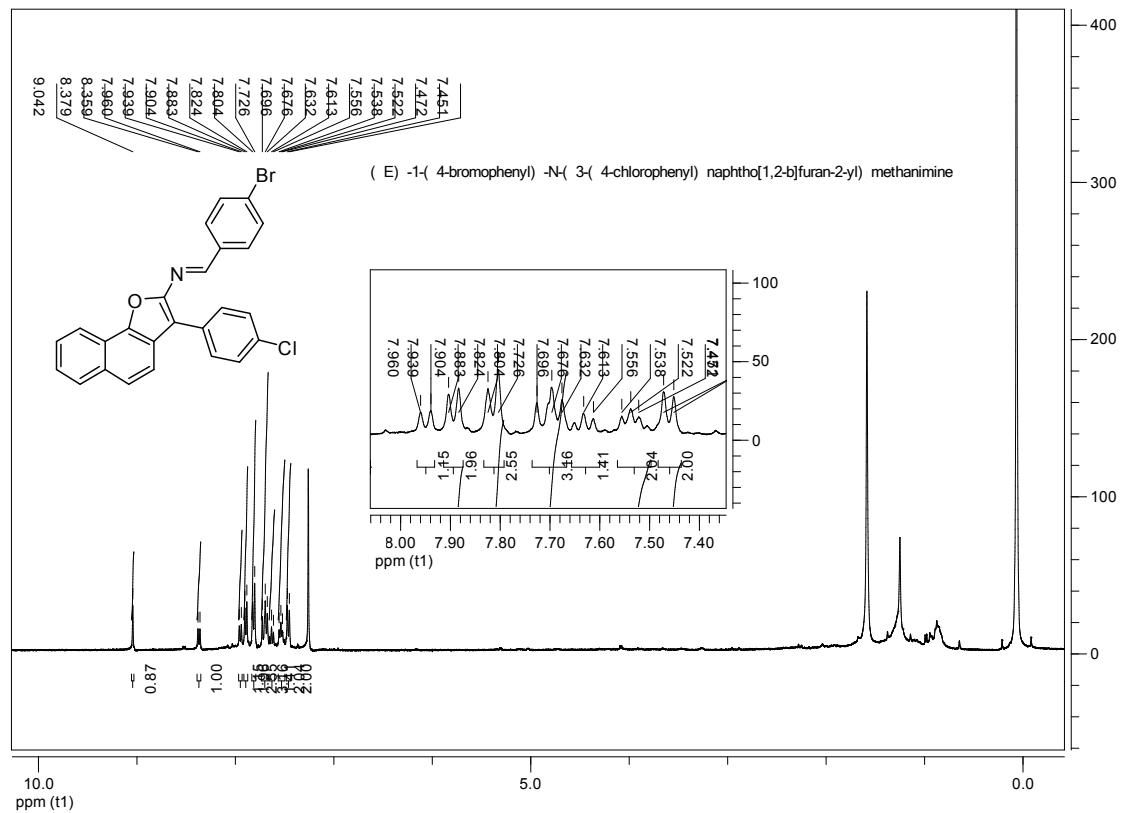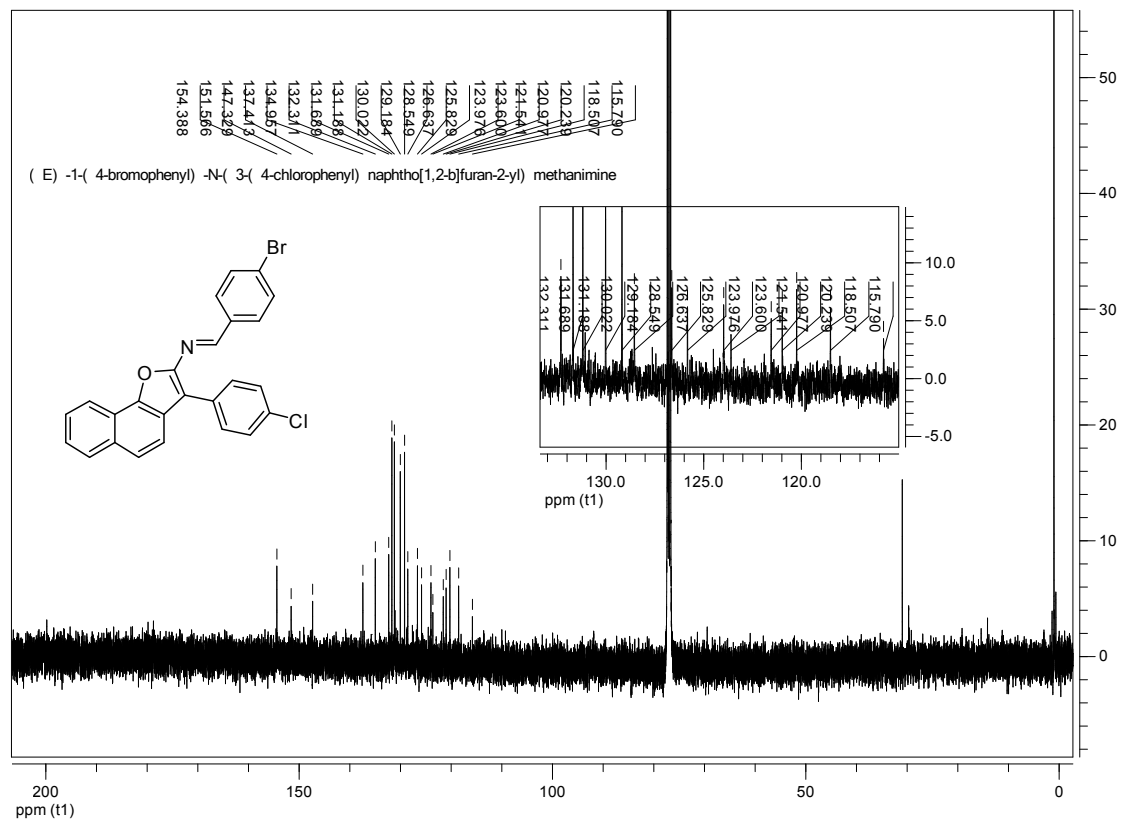

## X-ray Structure of 4b and 4f

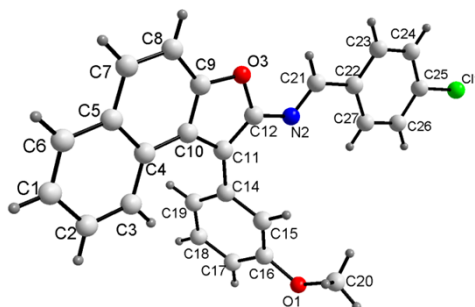

**Figure 1** Molecular structure of naphtho[2,1-*b*]furan derivative **4b**

Table 1-1. Crystal data and structure refinement for naphtho[2,1-*b*]furan derivative **4b**.

|                                   |                                                                                                                |
|-----------------------------------|----------------------------------------------------------------------------------------------------------------|
| Identification code               | <b>4b</b>                                                                                                      |
| Empirical formula                 | C <sub>26</sub> H <sub>18</sub> Cl N O <sub>2</sub>                                                            |
| Formula weight                    | 411.86                                                                                                         |
| Temperature                       | 293(2) K                                                                                                       |
| Wavelength                        | 0.71073 Å                                                                                                      |
| Crystal system, space group       | Monoclinic, P b c a                                                                                            |
| Unit cell dimensions              | a = 7.7340(10) Å    alpha = 90 deg.<br>b = 20.297(3) Å    beta = 90 deg.<br>c = 26.738(3) Å    gamma = 90 deg. |
| Volume                            | 4197.3(9) Å <sup>3</sup>                                                                                       |
| Z, Calculated density             | 8, 1.304 Mg/m <sup>3</sup>                                                                                     |
| Absorption coefficient            | 0.204 mm <sup>-1</sup>                                                                                         |
| F(000)                            | 1712                                                                                                           |
| Crystal size                      | 0.35 x 0.33 x 0.3 mm                                                                                           |
| Theta range for data collection   | 1.52 to 27.58 deg.                                                                                             |
| Limiting indices                  | -9 ≤ h ≤ 10, -21 ≤ k ≤ 26, -34 ≤ l ≤ 31                                                                        |
| Reflections collected / unique    | 32851 / 4854 [R(int) = 0.0799]                                                                                 |
| Completeness to theta = 27.58     | 98.2 %                                                                                                         |
| Refinement method                 | Full-matrix least-squares on F <sup>2</sup>                                                                    |
| Data / restraints / parameters    | 4766 / 0 / 272                                                                                                 |
| Goodness-of-fit on F <sup>2</sup> | 1.249                                                                                                          |
| Final R indices [I > 2σ(I)]       | R1 = 0.0792, wR2 = 0.1959                                                                                      |
| R indices (all data)              | R1 = 0.1836, wR2 = 0.2321                                                                                      |
| Largest diff. peak and hole       | 0.269 and -0.255 e.Å <sup>-3</sup>                                                                             |

Table 1-2. Atomic coordinates ( $\times 10^4$ ) and equivalent isotropic displacement parameters ( $\text{\AA}^2 \times 10^3$ ) for naphtho[2,1-*b*]furan derivative **4b**.  
 $U(\text{eq})$  is defined as one third of the trace of the orthogonalized  $U_{ij}$  tensor.

|       | x        | y       | z        | $U(\text{eq})$ |
|-------|----------|---------|----------|----------------|
| Cl(1) | 13126(2) | 1063(1) | -2388(1) | 125(1)         |
| O(1)  | 9691(3)  | 3476(1) | 170(1)   | 75(1)          |
| O(3)  | 7211(3)  | 279(1)  | 288(1)   | 53(1)          |
| N(2)  | 9173(3)  | 958(1)  | -159(1)  | 50(1)          |
| C(1)  | 3806(7)  | 1325(4) | 2248(2)  | 115(2)         |
| C(2)  | 4943(6)  | 1821(3) | 2066(2)  | 102(2)         |
| C(3)  | 5930(5)  | 1686(2) | 1656(1)  | 75(1)          |
| C(4)  | 5799(4)  | 1071(2) | 1406(1)  | 59(1)          |
| C(5)  | 4608(4)  | 590(2)  | 1593(1)  | 71(1)          |
| C(6)  | 3648(6)  | 739(3)  | 2018(2)  | 106(2)         |
| C(7)  | 4390(5)  | -12(2)  | 1334(2)  | 82(1)          |
| C(8)  | 5211(4)  | -144(2) | 901(1)   | 70(1)          |
| C(9)  | 6337(4)  | 329(2)  | 726(1)   | 52(1)          |
| C(10) | 6733(4)  | 914(2)  | 968(1)   | 49(1)          |
| C(11) | 7993(4)  | 1241(1) | 661(1)   | 46(1)          |
| C(12) | 8210(4)  | 845(1)  | 255(1)   | 48(1)          |
| C(14) | 8965(4)  | 1855(1) | 747(1)   | 47(1)          |
| C(15) | 8812(4)  | 2375(1) | 413(1)   | 49(1)          |
| C(16) | 9783(4)  | 2935(2) | 481(1)   | 56(1)          |
| C(17) | 10917(4) | 2988(2) | 878(1)   | 72(1)          |
| C(18) | 11031(5) | 2477(2) | 1211(1)  | 77(1)          |
| C(19) | 10061(4) | 1914(2) | 1152(1)  | 67(1)          |
| C(20) | 8473(5)  | 3463(2) | -229(1)  | 82(1)          |
| C(21) | 9210(4)  | 551(1)  | -521(1)  | 50(1)          |
| C(22) | 10161(4) | 683(1)  | -978(1)  | 50(1)          |
| C(23) | 10238(4) | 214(2)  | -1352(1) | 60(1)          |
| C(24) | 11143(5) | 330(2)  | -1786(1) | 70(1)          |
| C(25) | 11975(5) | 915(2)  | -1850(1) | 72(1)          |
| C(26) | 11902(4) | 1398(2) | -1485(1) | 75(1)          |
| C(27) | 11014(4) | 1280(2) | -1051(1) | 63(1)          |

Table 1-3. Bond lengths [Å] and angles [deg]  
for naphtho[2,1-*b*]furan derivative **4b**.

|                  |          |                 |          |
|------------------|----------|-----------------|----------|
| Cl(1)-C(25)      | 1.719(4) | O(1)-C(16)      | 1.377(4) |
| O(1)-C(20)       | 1.424(4) | O(3)-C(9)       | 1.354(4) |
| O(3)-C(12)       | 1.386(3) | N(2)-C(21)      | 1.274(3) |
| N(2)-C(12)       | 1.353(4) | C(1)-C(6)       | 1.344(7) |
| C(1)-C(2)        | 1.423(7) | C(1)-H(1)       | 0.9300   |
| C(2)-C(3)        | 1.363(5) | C(2)-H(2)       | 0.9300   |
| C(3)-C(4)        | 1.419(5) | C(3)-H(3)       | 0.9300   |
| C(4)-C(10)       | 1.414(4) | C(4)-C(5)       | 1.432(5) |
| C(5)-C(6)        | 1.391(6) | C(5)-C(7)       | 1.415(5) |
| C(6)-H(6)        | 0.9300   | C(7)-C(8)       | 1.346(5) |
| C(7)-H(7)        | 0.9300   | C(8)-C(9)       | 1.378(4) |
| C(8)-H(8)        | 0.9300   | C(9)-C(10)      | 1.386(4) |
| C(10)-C(11)      | 1.435(4) | C(11)-C(12)     | 1.363(4) |
| C(11)-C(14)      | 1.474(4) | C(14)-C(19)     | 1.380(4) |
| C(14)-C(15)      | 1.388(4) | C(15)-C(16)     | 1.375(4) |
| C(15)-H(15)      | 0.9300   | C(16)-C(17)     | 1.381(4) |
| C(17)-C(18)      | 1.370(5) | C(17)-H(17)     | 0.9300   |
| C(18)-C(19)      | 1.376(5) | C(18)-H(18)     | 0.9300   |
| C(19)-H(19)      | 0.9300   | C(20)-H(20A)    | 0.9600   |
| C(20)-H(20B)     | 0.9600   | C(20)-H(20C)    | 0.9600   |
| C(21)-C(22)      | 1.451(4) | C(21)-H(21)     | 0.9300   |
| C(22)-C(23)      | 1.381(4) | C(22)-C(27)     | 1.394(4) |
| C(23)-C(24)      | 1.377(4) | C(23)-H(23)     | 0.9300   |
| C(24)-C(25)      | 1.362(5) | C(24)-H(24)     | 0.9300   |
| C(25)-C(26)      | 1.385(5) | C(26)-C(27)     | 1.369(5) |
| C(26)-H(26)      | 0.9300   | C(27)-H(27)     | 0.9300   |
| C(16)-O(1)-C(20) | 118.1(2) | C(9)-O(3)-C(12) | 105.8(2) |
| C(21)-N(2)-C(12) | 121.5(3) | C(6)-C(1)-C(2)  | 121.7(4) |
| C(6)-C(1)-H(1)   | 119.1    | C(2)-C(1)-H(1)  | 119.1    |
| C(3)-C(2)-C(1)   | 118.6(5) | C(3)-C(2)-H(2)  | 120.7    |
| C(1)-C(2)-H(2)   | 120.7    | C(2)-C(3)-C(4)  | 121.0(4) |
| C(2)-C(3)-H(3)   | 119.5    | C(4)-C(3)-H(3)  | 119.5    |
| C(3)-C(4)-C(10)  | 123.5(3) | C(3)-C(4)-C(5)  | 118.8(3) |
| C(10)-C(4)-C(5)  | 117.6(3) | C(6)-C(5)-C(7)  | 121.7(4) |
| C(6)-C(5)-C(4)   | 118.7(5) | C(7)-C(5)-C(4)  | 119.6(3) |
| C(1)-C(6)-C(5)   | 121.2(5) | C(1)-C(6)-H(6)  | 119.4    |
| C(5)-C(6)-H(6)   | 119.4    | C(8)-C(7)-C(5)  | 122.5(3) |
| C(8)-C(7)-H(7)   | 118.7    | C(5)-C(7)-H(7)  | 118.7    |
| C(7)-C(8)-C(9)   | 116.8(4) | C(7)-C(8)-H(8)  | 121.6    |

|                     |          |                     |          |
|---------------------|----------|---------------------|----------|
| C(9)-C(8)-H(8)      | 121.6    | O(3)-C(9)-C(8)      | 123.8(3) |
| O(3)-C(9)-C(10)     | 110.9(2) | C(8)-C(9)-C(10)     | 125.3(3) |
| C(9)-C(10)-C(4)     | 117.9(3) | C(9)-C(10)-C(11)    | 106.2(3) |
| C(4)-C(10)-C(11)    | 135.7(3) | C(12)-C(11)-C(10)   | 105.4(3) |
| C(12)-C(11)-C(14)   | 124.1(3) | C(10)-C(11)-C(14)   | 130.5(3) |
| N(2)-C(12)-C(11)    | 128.3(3) | N(2)-C(12)-O(3)     | 120.1(2) |
| C(11)-C(12)-O(3)    | 111.6(3) | C(19)-C(14)-C(15)   | 119.4(3) |
| C(19)-C(14)-C(11)   | 120.5(3) | C(15)-C(14)-C(11)   | 120.0(3) |
| C(16)-C(15)-C(14)   | 119.8(3) | C(16)-C(15)-H(15)   | 120.1    |
| C(14)-C(15)-H(15)   | 120.1    | C(15)-C(16)-O(1)    | 123.4(3) |
| C(15)-C(16)-C(17)   | 120.8(3) | O(1)-C(16)-C(17)    | 115.8(3) |
| C(18)-C(17)-C(16)   | 118.9(3) | C(18)-C(17)-H(17)   | 120.6    |
| C(16)-C(17)-H(17)   | 120.6    | C(17)-C(18)-C(19)   | 121.2(3) |
| C(17)-C(18)-H(18)   | 119.4    | C(19)-C(18)-H(18)   | 119.4    |
| C(18)-C(19)-C(14)   | 119.8(3) | C(18)-C(19)-H(19)   | 120.1    |
| C(14)-C(19)-H(19)   | 120.1    | O(1)-C(20)-H(20A)   | 109.5    |
| O(1)-C(20)-H(20B)   | 109.5    | H(20A)-C(20)-H(20B) | 109.5    |
| O(1)-C(20)-H(20C)   | 109.5    | H(20A)-C(20)-H(20C) | 109.5    |
| H(20B)-C(20)-H(20C) | 109.5    | N(2)-C(21)-C(22)    | 122.1(3) |
| N(2)-C(21)-H(21)    | 119.0    | C(22)-C(21)-H(21)   | 119.0    |
| C(23)-C(22)-C(27)   | 118.6(3) | C(23)-C(22)-C(21)   | 120.2(3) |
| C(27)-C(22)-C(21)   | 121.3(3) | C(24)-C(23)-C(22)   | 120.9(3) |
| C(24)-C(23)-H(23)   | 119.5    | C(22)-C(23)-H(23)   | 119.5    |
| C(25)-C(24)-C(23)   | 119.7(3) | C(25)-C(24)-H(24)   | 120.2    |
| C(23)-C(24)-H(24)   | 120.2    | C(24)-C(25)-C(26)   | 120.7(3) |
| C(24)-C(25)-Cl(1)   | 120.2(3) | C(26)-C(25)-Cl(1)   | 119.1(3) |
| C(27)-C(26)-C(25)   | 119.6(3) | C(27)-C(26)-H(26)   | 120.2    |
| C(25)-C(26)-H(26)   | 120.2    | C(26)-C(27)-C(22)   | 120.5(3) |
| C(26)-C(27)-H(27)   | 119.7    | C(22)-C(27)-H(27)   | 119.7    |

---

Symmetry transformations used to generate equivalent atoms:

Table 1-4. Anisotropic displacement parameters ( $\text{\AA}^2 \times 10^3$ ) for naphtho[2,1-*b*]furan derivative **4b**. The anisotropic displacement factor exponent takes the form:

$$-2 \pi^2 [ h^2 a^{*2} U_{11} + \dots + 2 h k a^* b^* U_{12} ]$$

|       | U11    | U22    | U33    | U23    | U13    | U12    |
|-------|--------|--------|--------|--------|--------|--------|
| Cl(1) | 107(1) | 187(1) | 80(1)  | -9(1)  | 35(1)  | -15(1) |
| O(1)  | 69(2)  | 51(1)  | 106(2) | 14(1)  | -1(2)  | -15(1) |
| O(3)  | 50(1)  | 43(1)  | 67(1)  | 2(1)   | 1(1)   | -3(1)  |
| N(2)  | 49(2)  | 43(1)  | 56(2)  | -4(1)  | 1(1)   | 3(1)   |
| C(1)  | 77(3)  | 214(6) | 54(3)  | 22(3)  | 16(2)  | 40(4)  |
| C(2)  | 89(3)  | 148(4) | 69(3)  | -16(3) | -5(3)  | 43(3)  |
| C(3)  | 65(2)  | 110(3) | 50(2)  | 1(2)   | -2(2)  | 26(2)  |
| C(4)  | 47(2)  | 80(2)  | 48(2)  | 12(2)  | -2(2)  | 17(2)  |
| C(5)  | 43(2)  | 120(3) | 51(2)  | 31(2)  | 1(2)   | 9(2)   |
| C(6)  | 71(3)  | 183(5) | 63(3)  | 35(3)  | 5(3)   | 11(3)  |
| C(7)  | 57(2)  | 103(3) | 86(3)  | 37(3)  | -6(2)  | -10(2) |
| C(8)  | 54(2)  | 65(2)  | 91(3)  | 22(2)  | -6(2)  | -9(2)  |
| C(9)  | 38(2)  | 52(2)  | 65(2)  | 12(2)  | -4(2)  | 2(2)   |
| C(10) | 40(2)  | 57(2)  | 50(2)  | 17(2)  | -3(2)  | 9(2)   |
| C(11) | 48(2)  | 45(2)  | 47(2)  | 3(1)   | 0(1)   | 8(1)   |
| C(12) | 44(2)  | 43(2)  | 57(2)  | 3(2)   | 1(2)   | 3(2)   |
| C(14) | 47(2)  | 43(2)  | 50(2)  | -5(1)  | 3(2)   | 5(2)   |
| C(15) | 45(2)  | 48(2)  | 54(2)  | -2(2)  | 3(2)   | 0(2)   |
| C(16) | 45(2)  | 47(2)  | 77(2)  | -5(2)  | 6(2)   | 2(2)   |
| C(17) | 53(2)  | 54(2)  | 109(3) | -17(2) | -18(2) | -2(2)  |
| C(18) | 72(3)  | 74(2)  | 85(2)  | -19(2) | -28(2) | 2(2)   |
| C(19) | 76(2)  | 58(2)  | 66(2)  | -3(2)  | -19(2) | 8(2)   |
| C(20) | 76(3)  | 72(2)  | 99(3)  | 38(2)  | -2(2)  | -11(2) |
| C(21) | 46(2)  | 40(2)  | 62(2)  | -3(2)  | -6(2)  | 3(1)   |
| C(22) | 43(2)  | 54(2)  | 51(2)  | -8(2)  | -6(2)  | 9(2)   |
| C(23) | 55(2)  | 59(2)  | 66(2)  | -12(2) | -10(2) | 9(2)   |
| C(24) | 60(2)  | 96(3)  | 56(2)  | -23(2) | -1(2)  | 15(2)  |
| C(25) | 56(2)  | 105(3) | 56(2)  | -8(2)  | 8(2)   | 8(2)   |
| C(26) | 64(2)  | 80(2)  | 79(3)  | 0(2)   | 7(2)   | -16(2) |
| C(27) | 56(2)  | 66(2)  | 65(2)  | -15(2) | 4(2)   | -4(2)  |

Table 1-5. Hydrogen coordinates ( $\times 10^4$ ) and isotropic displacement parameters ( $\text{\AA}^2 \times 10^3$ ) for naphtho[2,1-*b*]furan derivative **4b**.

|        | x     | y    | z     | U(eq) |
|--------|-------|------|-------|-------|
| H(1)   | 3156  | 1408 | 2534  | 138   |
| H(2)   | 5011  | 2229 | 2223  | 122   |
| H(3)   | 6701  | 2001 | 1538  | 90    |
| H(6)   | 2883  | 428  | 2146  | 127   |
| H(7)   | 3652  | -328 | 1467  | 98    |
| H(8)   | 5027  | -536 | 729   | 84    |
| H(15)  | 8055  | 2345 | 143   | 59    |
| H(17)  | 11592 | 3363 | 918   | 87    |
| H(18)  | 11778 | 2511 | 1482  | 92    |
| H(19)  | 10144 | 1574 | 1383  | 80    |
| H(20A) | 7339  | 3377 | -98   | 124   |
| H(20B) | 8781  | 3121 | -461  | 124   |
| H(20C) | 8476  | 3880 | -398  | 124   |
| H(21)  | 8608  | 156  | -492  | 60    |
| H(23)  | 9672  | -187 | -1309 | 72    |
| H(24)  | 11185 | 10   | -2035 | 84    |
| H(26)  | 12453 | 1800 | -1534 | 89    |
| H(27)  | 10981 | 1601 | -803  | 75    |



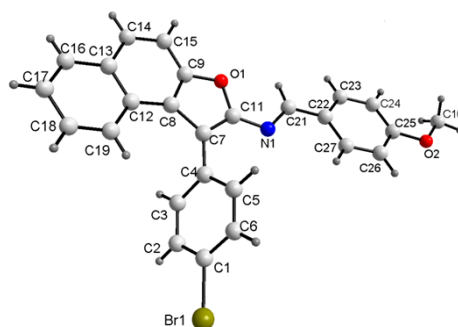

**Figure 2** Molecular structure of naphtho[2,1-*b*]furan derivative **4f**

Table 2-1. Crystal data and structure refinement for naphtho[2,1-*b*]furan derivative **4f**.

|                                   |                                                                                                                |
|-----------------------------------|----------------------------------------------------------------------------------------------------------------|
| Identification code               | <b>4f</b>                                                                                                      |
| Empirical formula                 | C <sub>26</sub> H <sub>18</sub> Br N O <sub>2</sub>                                                            |
| Formula weight                    | 456.31                                                                                                         |
| Temperature                       | 296(2) K                                                                                                       |
| Wavelength                        | 0.71073 Å                                                                                                      |
| Crystal system, space group       | Orthorhombic, Pca2(1)                                                                                          |
| Unit cell dimensions              | a = 15.285(3) Å    alpha = 90 deg.<br>b = 18.355(4) Å    beta = 90 deg.<br>c = 7.5960(16) Å    gamma = 90 deg. |
| Volume                            | 2131.1(8) Å <sup>3</sup>                                                                                       |
| Z, Calculated density             | 4, 1.422 Mg/m <sup>3</sup>                                                                                     |
| Absorption coefficient            | 1.951 mm <sup>-1</sup>                                                                                         |
| F(000)                            | 928.0                                                                                                          |
| Crystal size                      | 0.35 x 0.33 x 0.3 mm                                                                                           |
| Theta range for data collection   | 1.11 to 27.50 deg.                                                                                             |
| Limiting indices                  | -19 ≤ h ≤ 19, -17 ≤ k ≤ 23, -9 ≤ l ≤ 8                                                                         |
| Reflections collected / unique    | 10325 / 4870 [R(int) = 0.0574]                                                                                 |
| Completeness to theta = 27.50     | 99.0 %                                                                                                         |
| Refinement method                 | Full-matrix least-squares on F <sup>2</sup>                                                                    |
| Data / restraints / parameters    | 4411 / 1 / 272                                                                                                 |
| Goodness-of-fit on F <sup>2</sup> | 1.023                                                                                                          |
| Final R indices [I > 2σ(I)]       | R1 = 0.0888, wR2 = 0.2049                                                                                      |
| R indices (all data)              | R1 = 0.1696, wR2 = 0.2461                                                                                      |
| Absolute structure parameter      | 0.90(3)                                                                                                        |
| Largest diff. peak and hole       | 0.447 and -0.367 e.Å <sup>-3</sup>                                                                             |

Table 2-2. Atomic coordinates ( $\times 10^4$ ) and equivalent isotropic displacement parameters ( $\text{\AA}^2 \times 10^3$ ) for naphtho[2,1-*b*]furan derivative **4f**.  
 $U(\text{eq})$  is defined as one third of the trace of the orthogonalized  $U_{ij}$  tensor.

|       | x        | y       | z         | U(eq) |
|-------|----------|---------|-----------|-------|
| Br(1) | 2893(1)  | 1730(1) | 528(2)    | 96(1) |
| O(1)  | 6859(4)  | 3182(3) | 7142(9)   | 46(1) |
| C(22) | 8272(5)  | 1653(4) | 4451(11)  | 39(2) |
| C(8)  | 5424(5)  | 3469(3) | 7162(11)  | 35(2) |
| C(7)  | 5576(4)  | 2934(3) | 5781(10)  | 33(2) |
| C(11) | 6447(5)  | 2767(4) | 5860(10)  | 39(2) |
| O(2)  | 9927(5)  | 116(3)  | 2029(9)   | 61(2) |
| C(25) | 9394(6)  | 647(5)  | 2909(11)  | 50(2) |
| N(1)  | 6904(4)  | 2269(3) | 4927(8)   | 43(2) |
| C(4)  | 4956(5)  | 2632(4) | 4491(10)  | 39(2) |
| C(23) | 9178(6)  | 1694(4) | 4676(13)  | 51(2) |
| C(12) | 4678(5)  | 3824(4) | 7886(11)  | 41(2) |
| C(5)  | 4783(5)  | 1894(4) | 4355(11)  | 44(2) |
| C(9)  | 6228(5)  | 3599(4) | 7902(12)  | 44(2) |
| C(24) | 9732(5)  | 1197(5) | 3900(11)  | 48(2) |
| C(3)  | 4509(6)  | 3085(5) | 3330(12)  | 52(2) |
| C(21) | 7732(5)  | 2195(4) | 5288(12)  | 43(2) |
| C(27) | 7951(5)  | 1090(4) | 3432(12)  | 47(2) |
| C(1)  | 3746(5)  | 2099(6) | 2094(11)  | 53(2) |
| C(17) | 3281(7)  | 4562(6) | 9526(15)  | 68(3) |
| C(13) | 4837(5)  | 4324(4) | 9298(12)  | 47(2) |
| C(26) | 8495(6)  | 594(4)  | 2670(12)  | 54(2) |
| C(6)  | 4179(6)  | 1625(5) | 3186(13)  | 59(2) |
| C(19) | 3801(5)  | 3694(4) | 7397(12)  | 48(2) |
| C(15) | 6383(6)  | 4076(4) | 9323(13)  | 56(2) |
| C(2)  | 3920(6)  | 2825(5) | 2115(12)  | 58(2) |
| C(18) | 3129(6)  | 4045(6) | 8155(14)  | 62(3) |
| C(16) | 4105(6)  | 4696(4) | 10044(13) | 60(3) |
| C(14) | 5685(6)  | 4430(5) | 9978(13)  | 62(3) |
| C(10) | 10710(9) | 109(6)  | 2369(17)  | 82(3) |

Table 2-3. Bond lengths [Å] and angles [deg] for  
naphtho[2,1-*b*]furan derivative **4f**.

|                   |           |                   |           |
|-------------------|-----------|-------------------|-----------|
| Br(1)-C(1)        | 1.890(8)  | O(1)-C(9)         | 1.360(10) |
| O(1)-C(11)        | 1.387(9)  | C(22)-C(27)       | 1.382(12) |
| C(22)-C(23)       | 1.396(12) | C(22)-C(21)       | 1.441(11) |
| C(8)-C(9)         | 1.372(11) | C(8)-C(12)        | 1.424(11) |
| C(8)-C(7)         | 1.454(11) | C(7)-C(11)        | 1.368(10) |
| C(7)-C(4)         | 1.472(10) | C(11)-N(1)        | 1.351(10) |
| O(2)-C(10)        | 1.224(13) | O(2)-C(25)        | 1.435(11) |
| C(25)-C(24)       | 1.362(12) | C(25)-C(26)       | 1.390(13) |
| N(1)-C(21)        | 1.302(9)  | C(4)-C(5)         | 1.384(11) |
| C(4)-C(3)         | 1.391(11) | C(23)-C(24)       | 1.377(12) |
| C(12)-C(19)       | 1.411(11) | C(12)-C(13)       | 1.433(11) |
| C(5)-C(6)         | 1.373(12) | C(9)-C(15)        | 1.409(12) |
| C(3)-C(2)         | 1.375(13) | C(27)-C(26)       | 1.361(12) |
| C(1)-C(2)         | 1.359(13) | C(1)-C(6)         | 1.372(13) |
| C(17)-C(16)       | 1.342(13) | C(17)-C(18)       | 1.428(15) |
| C(13)-C(14)       | 1.409(12) | C(13)-C(16)       | 1.428(11) |
| C(19)-C(18)       | 1.342(12) | C(15)-C(14)       | 1.345(13) |
| C(9)-O(1)-C(11)   | 106.6(6)  | C(27)-C(22)-C(23) | 117.5(7)  |
| C(27)-C(22)-C(21) | 124.0(7)  | C(23)-C(22)-C(21) | 118.5(7)  |
| C(9)-C(8)-C(12)   | 118.6(7)  | C(9)-C(8)-C(7)    | 105.7(6)  |
| C(12)-C(8)-C(7)   | 135.6(7)  | C(11)-C(7)-C(8)   | 106.0(6)  |
| C(11)-C(7)-C(4)   | 124.9(7)  | C(8)-C(7)-C(4)    | 129.1(6)  |
| N(1)-C(11)-C(7)   | 129.1(7)  | N(1)-C(11)-O(1)   | 120.4(6)  |
| C(7)-C(11)-O(1)   | 110.4(6)  | C(10)-O(2)-C(25)  | 117.7(8)  |
| C(24)-C(25)-C(26) | 119.9(8)  | C(24)-C(25)-O(2)  | 123.1(8)  |
| C(26)-C(25)-O(2)  | 117.0(8)  | C(21)-N(1)-C(11)  | 117.5(7)  |
| C(5)-C(4)-C(3)    | 116.4(8)  | C(5)-C(4)-C(7)    | 122.7(7)  |
| C(3)-C(4)-C(7)    | 120.9(7)  | C(24)-C(23)-C(22) | 121.4(8)  |
| C(19)-C(12)-C(8)  | 125.6(7)  | C(19)-C(12)-C(13) | 117.8(7)  |
| C(8)-C(12)-C(13)  | 116.5(7)  | C(6)-C(5)-C(4)    | 121.9(8)  |
| O(1)-C(9)-C(8)    | 111.2(7)  | O(1)-C(9)-C(15)   | 123.7(7)  |
| C(8)-C(9)-C(15)   | 125.0(8)  | C(25)-C(24)-C(23) | 119.6(8)  |
| C(2)-C(3)-C(4)    | 122.7(9)  | N(1)-C(21)-C(22)  | 122.5(8)  |
| C(26)-C(27)-C(22) | 121.4(8)  | C(2)-C(1)-C(6)    | 121.3(8)  |
| C(2)-C(1)-Br(1)   | 119.6(7)  | C(6)-C(1)-Br(1)   | 119.1(8)  |
| C(16)-C(17)-C(18) | 119.2(8)  | C(14)-C(13)-C(16) | 120.6(8)  |
| C(14)-C(13)-C(12) | 121.3(7)  | C(16)-C(13)-C(12) | 118.1(8)  |
| C(27)-C(26)-C(25) | 120.2(8)  | C(5)-C(6)-C(1)    | 119.2(8)  |
| C(18)-C(19)-C(12) | 122.2(8)  | C(14)-C(15)-C(9)  | 116.8(8)  |

|                   |          |                   |          |
|-------------------|----------|-------------------|----------|
| C(1)-C(2)-C(3)    | 118.5(8) | C(19)-C(18)-C(17) | 120.5(9) |
| C(17)-C(16)-C(13) | 122.1(9) | C(15)-C(14)-C(13) | 121.8(8) |

---

Symmetry transformations used to generate equivalent atoms:

Table 2-4. Anisotropic displacement parameters ( $\text{\AA}^2 \times 10^3$ ) for naphtho[2,1-*b*]furan derivative **4f**.

The anisotropic displacement factor exponent takes the form:

$$-2 \pi^2 [ h^2 a^{*2} U_{11} + \dots + 2 h k a^* b^* U_{12} ]$$

|       | U11    | U22    | U33   | U23    | U13    | U12   |
|-------|--------|--------|-------|--------|--------|-------|
| Br(1) | 61(1)  | 153(1) | 73(1) | -35(1) | -25(1) | -6(1) |
| O(1)  | 38(3)  | 41(3)  | 59(4) | -4(3)  | -6(3)  | 3(2)  |
| C(22) | 45(4)  | 39(4)  | 31(4) | 7(4)   | -1(4)  | 9(3)  |
| C(8)  | 37(4)  | 23(3)  | 44(5) | 4(3)   | -8(4)  | 0(3)  |
| C(7)  | 44(4)  | 23(3)  | 32(4) | 5(3)   | -2(4)  | 2(3)  |
| C(11) | 41(4)  | 35(4)  | 40(5) | 5(4)   | -3(4)  | 4(4)  |
| O(2)  | 81(4)  | 48(3)  | 54(4) | -14(3) | -6(4)  | 9(3)  |
| C(25) | 58(5)  | 53(5)  | 38(5) | 1(4)   | 3(4)   | 11(4) |
| N(1)  | 38(4)  | 47(4)  | 44(4) | 10(3)  | -3(3)  | 9(3)  |
| C(4)  | 40(4)  | 47(5)  | 31(4) | -2(4)  | 2(4)   | 9(3)  |
| C(23) | 51(5)  | 47(5)  | 56(5) | 1(4)   | -6(5)  | 8(4)  |
| C(12) | 43(4)  | 27(4)  | 52(5) | 7(4)   | 3(4)   | -3(3) |
| C(5)  | 44(4)  | 42(5)  | 44(5) | 0(4)   | -13(4) | 5(4)  |
| C(9)  | 47(5)  | 33(4)  | 52(5) | 1(4)   | -2(4)  | -4(4) |
| C(24) | 38(4)  | 60(5)  | 46(5) | 1(4)   | 3(4)   | 6(4)  |
| C(3)  | 60(6)  | 52(5)  | 44(5) | 7(4)   | -6(5)  | 15(4) |
| C(21) | 52(5)  | 37(4)  | 40(5) | 5(4)   | -3(5)  | 5(3)  |
| C(27) | 41(4)  | 44(5)  | 56(5) | 5(4)   | -2(4)  | 9(4)  |
| C(1)  | 35(5)  | 92(7)  | 31(4) | -12(5) | -3(4)  | 12(4) |
| C(17) | 66(6)  | 72(6)  | 66(6) | 0(6)   | 22(6)  | 27(5) |
| C(13) | 57(5)  | 36(4)  | 48(5) | 0(4)   | -1(4)  | 6(4)  |
| C(26) | 66(6)  | 44(4)  | 52(5) | -7(4)  | -7(5)  | 6(4)  |
| C(6)  | 59(5)  | 58(6)  | 60(6) | -11(5) | 4(5)   | -1(5) |
| C(19) | 52(5)  | 48(5)  | 44(5) | -1(4)  | -6(4)  | -3(4) |
| C(15) | 51(5)  | 41(5)  | 76(6) | -12(5) | -14(5) | -1(4) |
| C(2)  | 62(6)  | 71(7)  | 42(5) | 4(5)   | -14(5) | 22(5) |
| C(18) | 44(5)  | 78(7)  | 63(7) | 4(5)   | 7(5)   | 15(5) |
| C(16) | 75(6)  | 35(4)  | 70(8) | -8(4)  | 17(5)  | 14(4) |
| C(14) | 78(6)  | 43(5)  | 66(7) | -18(5) | -8(5)  | -6(5) |
| C(10) | 114(9) | 64(6)  | 69(8) | -22(6) | 10(8)  | 38(6) |

Table 2-5. Hydrogen coordinates ( $\times 10^4$ ) and isotropic displacement parameters ( $\text{\AA}^2 \times 10^3$ ) for naphtho[2,1-*b*]furan derivative **4f**.

|        | x     | y    | z     | U(eq) |
|--------|-------|------|-------|-------|
| H(23)  | 9411  | 2065 | 5365  | 62    |
| H(5)   | 5086  | 1571 | 5076  | 52    |
| H(24)  | 10334 | 1237 | 4052  | 58    |
| H(3)   | 4613  | 3584 | 3378  | 62    |
| H(21)  | 7983  | 2503 | 6117  | 52    |
| H(27)  | 7350  | 1048 | 3264  | 56    |
| H(17)  | 2815  | 4803 | 10054 | 81    |
| H(26)  | 8264  | 220  | 1988  | 65    |
| H(6)   | 4064  | 1128 | 3136  | 71    |
| H(19)  | 3684  | 3353 | 6521  | 58    |
| H(15)  | 6941  | 4142 | 9785  | 67    |
| H(2)   | 3648  | 3139 | 1325  | 70    |
| H(18)  | 2561  | 3951 | 7785  | 74    |
| H(16)  | 4203  | 5043 | 10915 | 72    |
| H(14)  | 5765  | 4754 | 10905 | 75    |
| H(10A) | 10968 | 562  | 2012  | 123   |
| H(10B) | 10985 | -285 | 1748  | 123   |
| H(10C) | 10790 | 43   | 3612  | 123   |
